1 **Doublecortin and JIP3 are neural-specific counteracting regulators of**  
2 **dynein-mediated retrograde trafficking**

3

4 Lu Rao<sup>2#</sup>, Peijun Li<sup>1,5,6#</sup>, Xinglei Liu<sup>3</sup>, Qi Wang<sup>1</sup>, Alexander I. Son<sup>4</sup>, Arne  
5 Gennerich<sup>2,\*</sup>, Judy S. Liu<sup>3,\*</sup>, Xiaoqin Fu<sup>1,5,6\*</sup>

6 <sup>1</sup>The Second Affiliated Hospital and Yuying Children's Hospital, Wenzhou Medical University,  
7 Wenzhou, Zhejiang 325000, China;

8 <sup>2</sup>Department of Biochemistry and Gruss-Lipper Biophotonics Center, Albert Einstein College of  
9 Medicine, 1300 Morris Park Avenue, Bronx, New York 10461;

10 <sup>3</sup>Department of Neurology, Department of Molecular Biology, Cell Biology, and Biochemistry,  
11 Brown University, Providence, RI 02903, USA;

12 <sup>4</sup>Center for Neuroscience Research, Children's National Research Institute, Children's  
13 National Hospital, Washington DC 20010, USA.

14 <sup>5</sup>Key Laboratory of Structural Malformations in Children of Zhejiang Province, Wenzhou,  
15 325000, Zhejiang Province, China.

16 <sup>6</sup>Key Laboratory of Perinatal Medicine of Wenzhou, Wenzhou, Zhejiang, China

17 #: These authors contributed equally;

18 \*: Corresponding authors: [fuxq@wzhealth.com](mailto:fuxq@wzhealth.com), [judy\\_liu@brown.edu](mailto:judy_liu@brown.edu) and  
19 [arne.gennerich@einsteinmed.edu](mailto:arne.gennerich@einsteinmed.edu)

20

21

22

23

24 **SUMMARY**

25 Mutations in the microtubule (MT)-binding protein doublecortin (DCX) or in the MT-  
26 based molecular motor dynein result in lissencephaly. However, a functional link between  
27 DCX and dynein has not been defined. Here, we demonstrate that DCX negatively  
28 regulates dynein-mediated retrograde transport by reducing dynein's association with MTs  
29 and by disrupting the composition of the dynein motor complex. Previous work showed an  
30 increased binding of the adaptor protein C-Jun-amino-terminal kinase-interacting protein  
31 3 (JIP3) to dynein in the absence of DCX. Using purified components, we demonstrate that  
32 JIP3 forms an active motor complex with dynein and its cofactor dynactin with two dyneins  
33 per complex. DCX competes with the binding of the second dynein, resulting in a velocity  
34 reduction of the complex. We conclude that DCX negatively regulates dynein-mediated  
35 retrograde transport through two critical interactions by regulating dynein binding to MTs  
36 and by regulating the association of JIP3 to the dynein motor complex.

37

38 **Key words:** doublecortin, dynein, JIP3, retrograde trafficking, microtubule

39

## 40 INTRODUCTION

41 Lissencephaly is a cortical malformation characterized by a “smooth cortex” which arises  
42 from disruption of normal development (des Portes et al., 1998; Deuel et al., 2006; Francis  
43 et al., 1999; Gleeson et al., 1998). Patients with lissencephaly often have an associated  
44 microcephaly indicating defects in neural progenitor proliferation (Lee et al., 2010;  
45 Pramparo et al., 2010). Furthermore, the “smooth” brain is the result of abnormal neuronal  
46 migration, which causes an abnormally thick 4-layered cortex (Dobyns et al., 1984;  
47 Jellinger and Rett, 1976), and many patients with lissencephaly also have a reduction or  
48 absence of major axon tracts indicating problems with axon guidance or outgrowth  
49 (Kappeler et al., 2007). Thus, causative genes for lissencephaly encode proteins with  
50 critical roles in each of these steps in development: neural progenitor proliferation,  
51 neuronal migration, and axon outgrowth. Defining the molecular and cellular functions of  
52 lissencephaly genes are therefore critical for understanding early human neural  
53 development.

54 Interestingly, many of the causative genes for lissencephaly encode proteins related  
55 to the microtubule (MT) cytoskeleton. These include doublecortin (DCX), a MT-binding  
56 protein (des Portes et al., 1998; Gleeson et al., 1998); tubulin  $\alpha$ 1a, a major subunit of MTs  
57 (Keays et al., 2007); cytoplasmic dynein (hereinafter, “dynein”) heavy chain (DHC), the  
58 main retrograde motor protein (Poirier et al., 2013); and the dynein co-factor,  
59 lissencephaly1 (Lis1) (Reiner et al., 1993). This suggests that these MT proteins may be  
60 functionally related during neuronal development. Indeed, DCX overexpression can rescue  
61 nucleus–centrosome coupling defect and neuronal migration defect caused by the  
62 disruption of dynein/Lis1 function in mouse cerebellar granule neurons (Tanaka et al.,

63 2004). However, the molecular mechanisms through which these MT-related proteins are  
64 functional related are only partly understood.

65 Both DCX and doublecortin-like kinase 1 (DCLK1) regulate MT-based motor  
66 transport mediated by the Kinesin-3 family motor KIF1A (Deuel et al., 2006; Lipka et al.,  
67 2016; Liu et al., 2012). As DCX binds the surface of the MT lattice (Bechstedt and  
68 Brouhard, 2012; Fourniol et al., 2010), it is logical to hypothesize that DCX regulates  
69 axonal transport by modifying the interactions of molecular motors with MTs as they step  
70 along the MT lattice. DCX was found to be part of the dynein motor complex (Li et al.,  
71 2021; Tanaka et al., 2004) and influence the association between dynein and c-Jun NH2-  
72 terminal kinase (JNK)-interacting protein-3 (JIP3), an adaptor protein of kinesin and  
73 dynein that mediates both anterograde and retrograde transport (Arimoto et al., 2011;  
74 Drerup and Nechiporuk, 2013; Li et al., 2021), implying that DCX may influence other  
75 aspects of dynein function.

76 In the absence of MTs, dynein assumes an auto-inhibited “inverted” conformation  
77 (Torisawa et al., 2014; Toropova et al., 2017) and upon binding to its largest co-factor  
78 dynactin together with a cargo adaptor such as Bicaudal D2 (BicD2), converts into a  
79 parallel conformation capable of binding MTs (Chowdhury et al., 2015; McKenney et al.,  
80 2014; Olenick et al., 2016; Schlager et al., 2014; Zhang et al., 2017). Dynein-dynactin-  
81 BicD2 (DDB) complex formation is facilitated by Lis1, which interacts with dynein’s  
82 motor domain and prevents its auto-inhibitory conformation (Marzo et al., 2020). However,  
83 whether dynein and dynactin can form an active motor complex with JIP3, remains  
84 unknown.

85           In this study, we show that DCX plays critical roles in dynein-mediated retrograde  
86 transport in axons through two different mechanisms: First, DCX decreases dynein binding  
87 to MTs, and second, DCX regulates the association of dynein with JIP3. We further  
88 demonstrate for the first time the formation of ultra-processive dynein-dynactin-JIP3  
89 (DDJ) motor complexes with up to two dyneins and show that DCX displaces the second  
90 dynein from a DDJ complex, resulting in a reduction of the velocity of the DDJ motor  
91 complex. Together, we demonstrate that DCX plays key roles in axon-based transport to  
92 mediate the highly specific trafficking of proteins in both anterograde and retrograde  
93 directions during neuronal growth and development by modulating the activity of MT-plus  
94 and minus-end-directed motor proteins.

95

## 96 **RESULTS**

### 97 **Dynein-mediated retrograde trafficking increases in the absence of DCX.**

98           Our previous work showed that DCX is essential for the function of the MT plus-  
99 end-directed kinesin-3 motor KIF1A and regulates its anterograde trafficking (Liu et al.,  
100 2012). DCX has also been shown to associate with the MT minus-end-directed motor  
101 dynein (Tanaka et al., 2004). In addition, we recently reported that dynein is involved in  
102 the DCX-mediated trafficking of Golgi extensions into dendrites, suggesting a functional  
103 link between DCX and dynein (Li et al., 2021). To determine whether functional  
104 interactions between DCX and dynein exist, we tested whether DCX affects the retrograde  
105 trafficking of dynein.

106           To visualize dynein function *in vivo*, we first transfected either WT, *Dcx*<sup>-/y</sup>; or *Dcx*<sup>-</sup>  
107 */y*;*Dclk*<sup>-/-</sup> dissociated cortical neuronal cultures with a construct expressing RFP-tagged,

108 neuron-specific dynein intermediate chain (DIC) isoform IC-1B on DIV (days *in vitro*) 6  
109 (Ha et al., 2008). Time-lapse imaging of DIC IC-1B-RFP was performed on DIV8 to  
110 visualize dynein motor activity directly in axons. Recorded images were converted to  
111 kymographs (Fig. 1A). For all calculations and measurements of dynein-mediated  
112 movement, DIC above an intensity threshold located in the proximal region of axons (~  
113 100  $\mu\text{m}$  away from cell body) were analyzed. A complex was counted as mobile only if  
114 the displacement was at least 5  $\mu\text{m}$  over the course of the 180 seconds, otherwise it was  
115 counted as stationary. Distribution calculations of DIC mobility status (anterograde,  
116 retrograde and stationary) demonstrate that mobile DIC predominantly display retrograde  
117 movements in axons, and the percentages or run frequency of moving dynein complexes  
118 are similar in different neurons (Fig. 1B). Remarkably, both the run length (the average  
119 distance traveled during the recorded time period) and the velocity of the fluorescently-  
120 tagged dynein complexes were significantly increased in both *Dcx*<sup>-/y</sup> and *Dcx*<sup>-/y</sup>;*Dclk1*<sup>-/-</sup>  
121 axons compared to WT axons (Fig. 1C, Suppl. Videos 1-2) (run length and velocity  
122 distributions of retrograde moving DIC in different neurons are shown in Suppl. Fig. 1A).  
123 Reintroduction of DCX fully rescued the retrograde trafficking of DIC observed in *Dcx*<sup>-/y</sup>  
124 neurons (Fig. 1C, P is 0.57 and 0.18 for DCX rescue compared to WT for DIC run length  
125 and speed, respectively). In contrast, DCLK1, a doublecortin domain-containing protein  
126 that is structurally similar to DCX, only partially rescued the phenotype (Fig. 1C, P is 0.07  
127 and 0.25 for DCLK1 rescue compared to *Dcx*<sup>-/y</sup> for DIC run length and speed,  
128 respectively).

129         To determine whether the dynein-motility changes we see in neurons can also be  
130 observed for a physiologically relevant dynein cargo, we tested the retrograde trafficking

131 of Tropomyosin receptor kinase B (TrkB), the neurotrophin receptor whose retrograde  
132 transport is mediated by dynein (Ha et al., 2008; Heerssen et al., 2004; Yano et al., 2001;  
133 Zhou et al., 2012). As with IC-1B, the run length and velocity of retrogradely moving TrkB  
134 are also significantly increased in *Dcx-/y* axons (Fig. 1D and 1E, Suppl. Videos 3-4), and  
135 reintroduction of DCX into *Dcx-/y* neurons rescued the phenotype (Fig. 1E, P is 0.64 and  
136 0.057 for DCX rescue compared to WT for TrkB run length and speed, respectively). Like  
137 IC-1B, the majority of mobile TrkB vesicles in axons were transported in retrograde  
138 direction (Fig. 1F) and no significant differences were found between the percentage of  
139 vesicles measured under WT, *Dcx-/y*, and rescue conditions for anterograde and retrograde  
140 moving particles and for stationary vesicles (Fig. 1F) (run length and velocity distributions  
141 of IC-1IB and TrkB vesicles are shown in Suppl. Fig. 1B). Overall, our data indicate that  
142 loss of DCX increases dynein-mediated vesicular retrograde transport in the axon.

143

144 **The effect of DCX on retrograde transport is mediated through direct interactions**  
145 **between DCX and dynein**

146 In addition to its binding to MTs, DCX also associates with the dynein motor  
147 complex (Tanaka et al., 2004; Taylor et al., 2000). Pull down assay confirms there exists  
148 direct interaction between DCX and cytoplasmic dynein intermediate chain 2 (Table 1).  
149 We therefore hypothesized that DCX influences dynein movement through direct  
150 interactions. To confirm that DCX interacts with dynein and to define which domain of  
151 DCX is critical for its association with dynein, we expressed HA-tagged full-length DCX  
152 (FL-DCX), an N-terminal DCX construct (N-DCX) containing the R1 and R2 MT-binding  
153 domains (amino acids 1-270) or a C-terminal construct containing the Serine/Proline (SP)

154 rich domain of DCX (C-DCX) (amino acids 271-361, Fig. 2A) in HEK293 cells. Consistent  
155 with the previous report (Tanaka et al., 2004), DIC precipitated with FL-DCX (Fig. 2B).  
156 Interestingly, more DIC precipitated with N-DCX than FL-DCX (Fig. 2B); similarly, N-  
157 DCX showed an increased immunoprecipitation of the DHC compared to FL-DCX (Suppl.  
158 Fig. 2A). This result suggests that N-DCX has a stronger affinity for the dynein motor  
159 complex than FL-DCX. We reasoned that if the interaction of DCX with dynein plays an  
160 important role in regulating dynein function, then N-DCX should have a stronger effect on  
161 regulating dynein-mediated retrograde transport than FL-DCX. Indeed, introducing N-  
162 DCX either into DCX knockout neurons (Fig. 2C-D and Suppl. Fig. 3A-B) or WT neurons  
163 (Fig. 2F-G and Suppl. Fig. 3C-D) decreases the retrograde transport of TrkB to a greater  
164 extent than FL-DCX. Our results suggest that DCX decreases dynein-mediated retrograde  
165 transport through direct interactions with dynein motor complex.

166

### 167 **The C-terminal S/P-rich domain of DCX decreases DCX-dynein interactions**

168 In contrast to FL-DCX and N-DCX, C-DCX did not immunoprecipitate with  
169 dynein (Suppl. Fig. 2B-C), consistent with previous report (Taylor et al., 2000). Since N-  
170 DCX, which misses the C-terminal domain, has a stronger affinity for dynein than FL-  
171 DCX, we hypothesized that the C-terminus of DCX inhibits the interaction between DCX  
172 and dynein. Indeed, in the presence of C-DCX, significantly less DIC precipitated with FL-  
173 DCX (Fig. 2E); similarly, less DHC was precipitated with either FL-DCX or N-DCX in  
174 the presence of C-DCX (Suppl. Fig. 3B-C). Furthermore, C-DCX overexpression in WT  
175 neurons significantly increased dynein-mediated retrograde transport of TrkB (Fig. 2F-G  
176 and Suppl. Fig. 3C-D). Taken together, these data indicate that DCX decreases dynein-



177 mediated retrograde transport through direct interactions with the dynein motor complex  
178 through its N-terminus, while the C-terminal domain of DCX negatively impacts this  
179 interaction to influence dynein-based cargo trafficking.

180

### 181 **The effects of DCX on retrograde trafficking require DCX-MT interactions**

182 Previous work has shown that the binding of DCX to MTs contributes to DCX's cellular  
183 functions (Moslehi et al., 2019; Reiner, 2013; Schaar et al., 2004; Yap et al., 2012) and that  
184 DCX's MT interactions occur cooperatively (Bechstedt and Brouhard, 2012). To test  
185 whether MT binding and the underlying cooperativity of DCX's MT interactions play a  
186 role in regulating dynein-based vesicular transport, we tested whether two DCX mutants,  
187 DCX A71S and T203R, could rescue the increase in retrograde transport of TrkB vesicles  
188 in DCX knockout neurons. These mutations, located in the R1 and R2 region of DCX,  
189 respectively, cause lissencephaly in humans and have been shown to decrease the  
190 cooperative MT binding of DCX (Bechstedt and Brouhard, 2012). Importantly, these  
191 mutations have no effect on DCX's ability to associate with dynein *in vitro* (Suppl. Fig.  
192 2D). Both mutants were unable to rescue the phenotype of increased retrograde transport  
193 of TrkB (Fig. 3A and Suppl. Fig. 4), suggesting that the cooperative binding of DCX to  
194 MTs is required for the DCX-induced decrease in dynein-based retrograde transport. In  
195 addition, our MT-binding assay demonstrates that, while C-DCX itself does not bind MTs,  
196 C-DCX increases the interactions of DCX with MTs (Fig. 3B). This suggests that the  
197 interactions between DCX and MTs are enhanced by DCX's C-terminal domain, which is  
198 consistent with recent findings that the tail of DCX (amino acid 303 to the C-terminal end)  
199 helps to maintain the associations between DCX molecules on the MT lattice (Rafiei et al.,

200 2022).

201

## 202 **DCX decreases dynein association with MTs**

203           Since DCX enhances the binding of KIF1A to MTs and regulates KIF1A-mediated  
204 transport (Liu et al., 2012), we tested whether DCX also alters dynein's interactions with  
205 MTs by performing a MT-binding assay using brain lysate from either WT, *Dcx*<sup>-/y</sup>, or *Dcx*<sup>-/y</sup>;  
206 *Dclk1*<sup>-/-</sup> mice. Our results show that significantly more DIC protein precipitates with  
207 MTs in the absence of DCX (Fig. 3C-D). Therefore, in contrast to DCX's positive effects  
208 on KIF1A's association with MTs (Liu et al., 2012), DCX decreases dynein-MT  
209 interactions.

210

## 211 **DCX negatively regulates dynein-mediated retrograde transport by regulating JIP3** 212 **association with dynein**

213           Various binding partners are known to regulate dynein-based cargo transport  
214 (Vallee et al., 2012) and DCX could achieve its effect on the retrograde transport of TrkB  
215 by altering dynein's association with regulatory proteins. Indeed, we previously reported  
216 that DCX regulates the interaction of dynein with its cargo adaptor JIP3 (Li et al., 2021),  
217 suggesting that DCX may regulate dynein-based cargo transport by controlling dynein-  
218 dynactin complex assembly and/or dynein-cargo attachment. In support of this idea, JIP3  
219 also decreases the binding of DCX to dynein (Fig. 4A). As JIP3 serves as an adaptor protein  
220 for both kinesin and dynein (Arimoto et al., 2011; Drerup and Nechiporuk, 2013), DCX  
221 could differentially regulate anterograde vs. retrograde transport by competing with JIP3  
222 for the binding of dynein. To test this possibility, we examined the retrograde transport of

223 TrkB-RFP in *Dcx* knockout cortical neurons transfected with either control shRNA or JIP3  
224 shRNA. Knockdown of JIP3 indeed significantly decreases the retrograde transport of  
225 TrkB (Fig. 4B-C, Suppl. Fig. 5 and Suppl. Video 5) while overexpression of JIP3 in WT  
226 neurons increases the retrograde transport TrkB (Fig. 4B-C, Suppl. Fig. 5 and Suppl. Video  
227 6). Based on these results, we conclude that at least two mechanisms are at play when DCX  
228 regulates dynein-based transport: first, through negatively regulating dynein interactions  
229 with MTs, and secondly, through negatively regulating dynein interactions with JIP3.

230

### 231 **Dynein, dynactin and JIP3 form a processive tripartite complex *in vitro***

232 To directly determine how DCX affects the motion of the dynein motor complex,  
233 we used total internal reflection fluorescence (TIRF) microscopy and performed single-  
234 molecule motility studies using purified components. Dynein, which assumes an auto-  
235 inhibited conformation in isolation (Torisawa et al., 2014; Zhang et al., 2017), moves  
236 processively along coverslip-attached MTs after its activation through the formation of a  
237 complex with its largest cofactor dynactin and a coiled-coil cargo adaptor protein such as  
238 Bicaudal D2 (BicD2) (McKenney et al., 2014; Splinter et al., 2012). Complexes such as  
239 dynein-dynactin-BicD2 (DDB), dynein-dynactin-BicDR1 (Bicaudal-D-related protein 1)  
240 (DDR), and dynein-dynactin-Hook3 (DDH), which have been recently shown to bind up  
241 to two dyneins (Grotjahn et al., 2018; Urnavicius et al., 2018), have been extensively  
242 studied using single-molecule TIRF assays (Christensen et al., 2021; McClintock et al.,  
243 2018; McKenney et al., 2014; Sladewski et al., 2018; Urnavicius et al., 2018). However,  
244 whether dynein-dynactin-JIP3 (DDJ) motor complexes can be reconstituted *in vitro*  
245 remains unknown.

246 Previous biochemical studies have shown that JIP3 interacts with dynein's light  
247 intermediate chain (LIC) (Arimoto et al., 2011) and with kinesin-1's light (Bowman et al.,  
248 2000) and heavy chains (Sun et al., 2011). Mutations in JIP3 result in the mis-localization  
249 of the dynein and impair retrograde transport (Arimoto et al., 2011; Celestino et al., 2021).  
250 However, the current consensus is that the coiled-coil region of JIP3 is too short to form a  
251 stable complex with dynein and dynactin (Chaaban and Carter, 2022; Lee et al., 2020;  
252 Reck-Peterson et al., 2018). Indeed, the putative N-terminal  $\alpha$ -helix of JIP3, which is  
253 followed by an intrinsically disordered domain, extends only up to ~180 residues according  
254 to the structural prediction by AlphaFold (Jumper et al., 2021) (Suppl. Fig. 6C). In contrast,  
255 cargo adaptors that have been successfully used for *in vitro* motility assays have been  
256 predicted to have substantially longer N-terminal coiled-coil domains. For example, the  
257 coiled coil of BicD2 is predicted to extend to ~270 residues and cover the full shoulder of  
258 dynactin (Suppl. Fig. 6A-B), in agreement with cryo-EM studies (Urnavicius et al., 2015).  
259 Nonetheless, based on our *in vivo* and immunoprecipitation results, we hypothesized that  
260 JIP3 can form a tripartite complex with dynein and dynactin, possibly through a transition  
261 of its disordered domain into a more ordered conformation upon binding to  
262 dynein/dynactin. The latter idea is supported by the recently reported transition of a random  
263 coil in Nup358 into an  $\alpha$ -helix upon binding to BicD2 (Gibson et al., 2022).

264 To test whether JIP3 can form an active DDJ motor complex, we generated and  
265 expressed a mouse JIP3 construct containing the N-terminal coiled-coil and the predicted  
266 adjacent intrinsically disordered domain (amino acids 1-240) in *E. coli* (Fig 5A and Suppl.  
267 Fig. 7A). The homolog of this construct in *Caenorhabditis elegans* has been shown to  
268 interact with dynein through the dynein LIC (Arimoto et al., 2011). To generate and purify

269 full-length human dynein with its associated five subunits (IC, LIC, Tctex, LC8 and Robl),  
270 we co-expressed the five subunits with the HC of dynein in insect cells as done before  
271 (Suppl. Fig. 7C) (Schlager et al., 2014). To allow single-molecule fluorescence imaging of  
272 both dynein and JIP3, we labeled the dynein HC with SNAP-TMR via an N-terminal  
273 SNAP-tag and JIP3 with Halo-JF646 via a C-terminal HaloTag (Fig. 5A).

274 As expected for an auto-inhibited motor, the purified dynein only diffused along  
275 MTs or bound rigidly (McKenney et al., 2014; Schlager et al., 2014), and the addition of  
276 dynactin (purified from cow brain (Schlager et al., 2014)), did not activate its motion (Fig  
277 5B). While JIP3 transiently interacts with dynein (Suppl. Fig. 8A, Suppl. Video 7), it can  
278 neither stably bind to dynein (Suppl. Fig. 8B) nor activate dynein motion (Fig. 5B), similar  
279 to other studied dynein adaptors (McKenney et al., 2014; Schlager et al., 2014). However,  
280 strikingly, when we incubated JIP3 with dynein and dynactin on ice for 1 hour in a 1:1:1  
281 stoichiometry, DDJ complexes formed and moved processively along MTs (Fig. 5B) at a  
282 velocity of 0.8 [0.7, 0.9]  $\mu\text{m/s}$  (median with 95% CIs) (Fig. 5C), which is comparable to  
283 other dynein complexes (Elshenawy et al., 2019; McKenney et al., 2014; Urnavicius et al.,  
284 2018). Our results demonstrate that JIP3 and dynactin are involved in dynein activation  
285 and that JIP3 can form highly processive DDJ complexes despite its predicted short coiled-  
286 coil domain.

287

### 288 **DCX decreases the velocity of DDJ motor complexes**

289 To determine whether DCX negatively impacts the velocity of DDJ motor  
290 complexes as suggested by our *in vivo* results, we expressed full-length DCX and N-DCX  
291 with a C-terminal ybbR-tag (Yin et al., 2006) for labeling with CoA-CF488 or CoA-JF549

292 in *E. coli* (Suppl. Fig. 7B). We chose the small  $\alpha$ -helical ybbR tag over the commonly used  
293 GFP tag (Bechstedt and Brouhard, 2012; Ettinger et al., 2016) to reduce possible steric  
294 blocking of dynein MT-binding sites by the introduced tag. At 10 nM concentration, DCX  
295 fully decorated MTs (Suppl. Fig. 9A) in the dynein motility buffer, while N-DCX had a  
296 much weaker affinity for MTs (Suppl. Fig. 9B), which is consistent with our  
297 immunoprecipitation data that demonstrated that the addition of C-DCX increased the  
298 affinity of DCX for MTs (Fig. 3B). Only when the ionic strength of the buffer was reduced,  
299 increasing amounts of N-DCX bound to MTs (Suppl. Fig. 9C). These observations confirm  
300 that our ybbR-tagged and labeled DCX constructs are functional.

301 Decorating MTs using 10 nM DCX slightly reduced DDJ's velocity (0.62 [0.50,  
302 0.70]  $\mu\text{m/s}$ , \* $p < 0.1$ ) (Fig. 5C), while N-DCX had a stronger effect on the velocity (0.54  
303 [0.45, 0.67]  $\mu\text{m/s}$ , \*\*\* $p < 0.001$ ) (Fig. 5C), which is consistent with our *in vivo* results (Fig.  
304 2). The more pronounced effect of N-DCX on DDJ velocity supports our *in vivo* results  
305 that showed that the C-terminus of DCX negatively regulates DCX-dynein binding (Fig.  
306 2E). Moreover, since N-DCX doesn't bind MTs in regular motility buffer but only binds  
307 MTs in a motility buffer with half ionic strength (Suppl. Fig. 9B-C), N-DCX likely acts  
308 directly upon the DDJ complex rather than through MT binding.

309 To determine if N-DCX acts specifically on dynein, we also tested FL-DCX and  
310 N-DCX on another canonical MT-based motor, the kinesin-1 family member KIF5B. In  
311 contrast to the effects on DDJ, N-DCX has no effects on the velocity of KIF5B, while FL-  
312 DCX reduces the velocity of KIF5B (Fig. 5C), a result which agrees with a recent study  
313 that showed that DCX decreases the binding of kinesin-1 to MTs (Monroy et al., 2020).  
314 These results collectively suggest that DCX differentially affects the velocities of DDJ and

315 kinesin-1: while DCX affects kinesin-1 motility through its binding to MTs, N-DCX affects  
316 DDJ motility through direct interactions with the dynein motor complex.

317 To dissect which component of the dynein motor complex N-DCX regulates, we  
318 first performed an MT-gliding assay using a N-terminal GFP-tagged single-headed human  
319 dynein construct expressed in insect cells (Htet et al., 2020). The single-headed dynein only  
320 contains the motor domain of the heavy chain, while the tail domain and all other subunits  
321 are absent. As this motor construct is non-processive (Trokter et al., 2012), we performed  
322 an MT-gliding assay to probe the effects of DCX on the activity of the dynein motor  
323 domain. To do so, we bound the GFP-tagged dyneins to a cover-glass surface via anti-GFP  
324 antibody at a motor-surface density that supports smooth gliding of MTs along the cover-  
325 glass surface. If N-DCX acts directly on the dynein motor domain as the dynein co-factor  
326 Lis1 does (Canty and Yildiz, 2020; DeSantis et al., 2017; Htet et al., 2020; Marzo et al.,  
327 2020), one would expect a reduction in gliding velocity when N-DCX is added. However,  
328 we found that N-DCX doesn't affect MT gliding by single-headed dynein (Fig. 5C), which  
329 suggests that N-DCX regulates dynein through interactions with the dynein tail or through  
330 binding to dynein's associated subunits. In contrast to N-DCX, we find that DCX decreases  
331 the MT gliding velocity slightly (Fig. 5C). This result implies that DCX also affects dynein-  
332 MT interactions through direct MT binding, while N-DCX, which does not bind MTs under  
333 the motility buffer conditions (Suppl. Fig. 9B), does not affect MT gliding powered by the  
334 dynein motor domain. This result implies that DCX may regulate dynein function via two  
335 pathways: through direct interactions with the dynein motor complex and through the  
336 binding to MTs.

337

### 338 **DCX interferes with the recruitment of a second dynein to DDJ**

339 Previous studies have demonstrated that BicD2 can recruit two dimeric dyneins and  
340 that a DDB complex with two dyneins shows higher velocities compared to a DDB  
341 complex with one dynein (Elshenawy et al., 2019; Sladewski et al., 2018; Urnavicius et al.,  
342 2018). Adaptors such as BicDR1 and Hook3, which predominantly recruit two dyneins,  
343 also show increased velocities compared to DDR and DDH complexes with only one  
344 dynein (Elshenawy et al., 2019; Urnavicius et al., 2018). We note that the velocity  
345 reduction of DDJ in the presence of N-DCX is similar to the velocity reduction when a  
346 two-dynein motor assembly loses a dynein motor. Moreover, when we assembled DDJ  
347 complexes in the presence of N-DCX, the velocity of DDJ was reduced further (0.41 [0.32,  
348 0.60]  $\mu\text{m/s}$ , \*\*\*\* $p < 0.0001$ ) (Fig. 5C).

349 To test the hypothesis that N-DCX displaces the second dynein from a DDJ motor  
350 complex with two dyneins, we first determined whether JIP3 permits the recruitment of  
351 two dyneins. To do so, we assembled DDJ complexes using equal amounts of dynein  
352 labeled with TMR and Alexa-647. In the absence of DCX, we indeed observed moving  
353 DDJ complexes with two colocalized colors, demonstrating that DDJ can recruit two  
354 dyneins (Fig. 6A). The fraction of colocalization was  $42 \pm 2\%$  (mean  $\pm$  SEM), which is  
355 comparable to the colocalization of DDR and DDH complexes with two differently labeled  
356 dyneins (Elshenawy et al., 2019; Urnavicius et al., 2018). In support of our hypothesis that  
357 N-DCX displaces a dynein from a two-dynein motor complex, addition of N-DCX reduced  
358 the co-localization fraction to  $27 \pm 3\%$  (Fig. 6B), which is close to the reported  
359 colocalization of the DDB motor complex (Elshenawy et al., 2019). In addition, those few  
360 remaining DDJ complexes that contained two colocalized dyneins despite the presence of



361 N-DCX, showed a reduced velocity in the presence of N-DCX (Fig. 6C). In conclusion,  
362 similar to DDR and DDH, DDJ predominantly recruits two dyneins, and N-DCX interferes  
363 with the binding of the second dynein; N-DCX can still affect the velocity of the DDJ  
364 complex with even two dyneins, possibly via disrupting interaction between the tails of the  
365 two dyneins (Elshenawy et al., 2019).

366

367 **Rescuing retrograde transport defects in *Dcx*<sup>-/y</sup>; *Dclk1*<sup>-/-</sup> neurons ameliorates**  
368 **neuronal migration defects.**

369 One of the characteristics of DCX-linked lissencephaly is a profound defect in  
370 cortical neuronal migration. We therefore asked whether the effects of DCX on dynein-  
371 based retrograde transport we observe play a role in the migration of cortical neurons  
372 during development. If the answer is yes, rescuing the abnormally increased dynein-based  
373 retrograde trafficking should mitigate the cortical neuronal migration defects observed in  
374 the developing *Dcx*<sup>-/y</sup>; *Dclk1*<sup>-/-</sup> mouse brain (Deuel et al., 2006; Koizumi et al., 2006).  
375 Since cortical neuronal migration is relatively normal in the *Dcx*<sup>-/y</sup> mouse (Corbo et al.,  
376 2002), we used a *Dcx*<sup>-/y</sup>; *Dclk1*<sup>-/-</sup> mouse, which has a cortical neuronal migration defect  
377 as the *Dcx*-redundant gene *Dclk1* is knocked out as well (Deuel et al., 2006; Koizumi et al.,  
378 2006). A plasmid expressing GFP and a shRNA that specifically targets DHC (Tsai et al.,  
379 2007) was micro-injected into the lateral ventricle of embryonic day (E)14.5 *Dcx*<sup>-/y</sup>; *Dclk1*<sup>-/-</sup>  
380 <sup>-/-</sup> mouse brains and transfected using in utero electroporation. Mouse embryos were then  
381 sacrificed on E18.5. As expected, down-regulating DHC partially rescued the retention of  
382 neuroblasts in the deeper region of the cortex observed in *Dcx*<sup>-/y</sup>; *Dclk1*<sup>-/-</sup> mouse brains  
383 (Fig. 7A-B). Based on these results, we wondered whether the dysregulation of dynein is

384 in part due to increased association of JIP3 with dynein in the absence of DCX and whether  
385 downregulation of JIP3 expression may also ameliorate neuronal migration defects. To test  
386 this possibility, we microinjected plasmids expressing JIP3 shRNA1 and GFP into the  
387 lateral ventricle of E14.5 *Dcx*<sup>-/y</sup>; *Dclk1*<sup>-/-</sup> embryos and transfected the plasmids into neural  
388 progenitors using in utero electroporation. In agreement with our hypothesis, down  
389 regulation of JIP3 in *Dcx*<sup>-/y</sup>; *Dclk1*<sup>-/-</sup> mouse brain significantly rescued the lamination  
390 defect (Fig. 7C-D). Collectively, our results demonstrate the importance of the regulation  
391 of dynein-dependent retrograde trafficking by DCX and JIP3 during neuronal migration.

392

## 393 **DISCUSSION**

394 Previous reports have linked DCX, a causative gene for classical lissencephaly in  
395 males, to defects in dynein-based functions in neurons (Kaplan and Reiner, 2011; Li et al.,  
396 2021; Tanaka et al., 2004), but how DCX modulates dynein functions has remained unclear.  
397 In this study, we demonstrate for the first time that DCX negatively regulates dynein-  
398 mediated retrograde trafficking in neuronal axons through its interactions with MTs and  
399 through interactions with the dynein motor complex (Fig. 8). We show that DCX decreases  
400 the velocity and processivity of dynein-based cargo transport *in vivo* and the velocity of  
401 dynein-dynactin-JIP3 motor complexes *in vitro* and demonstrate that the DCX-based  
402 regulation of dynein-driven retrograde transport is important to cortical development.  
403 Combined with our previous finding that DCX positively regulates KIF1A-mediated  
404 anterograde transport (Liu et al., 2012), we conclude that DCX differentially regulates  
405 anterograde and retrograde intracellular trafficking in neuronal axons, and therefore  
406 mediates the transport of critical protein complexes during neuronal growth and

407 development.

408

409 **DCX negatively regulates dynein motion through interactions with both dynein and**  
410 **MTs**

411 Studies from other labs demonstrated that kinesin and dynein engage in a “tug-of-  
412 war” when attached to the same cargo (Belyy et al., 2016; Gennerich and Schild, 2006;  
413 Rezaul et al., 2016). It is therefore possible that DCX’s effects on dynein-mediated  
414 retrograde transport are indirect effects through anterograde transport. However, our data  
415 show that DCX affects retrograde transport directly, both through its binding to MTs and  
416 through its direct interactions with the dynein motor complex. The importance of DCX-  
417 MT interactions for retrograde transport is based on our observation that the pathogenic  
418 DCX mutations A71S and T203R, which decrease the cooperative binding of DCX to MTs  
419 but have no effect on DCX and dynein interactions, fail to restore dynein-mediated  
420 retrograde trafficking. At the same time, our data reveal that DCX directly interacts with  
421 the dynein motor complex through its N-terminal domain both *in vivo* and *in vitro*, and this  
422 interaction also negatively regulates retrograde transport. Our immunoprecipitation  
423 experiments show that N-DCX without DCX’s C-terminal domain has a stronger affinity  
424 for dynein, while our *in vivo* results indicate that N-DCX has a stronger inhibitory effect  
425 on dynein-mediated retrograde transport than the FL-DCX; these results are further  
426 supported by our *in vitro* experiments that demonstrate that N-DCX more strongly reduces  
427 the velocity of reconstituted DDJ complexes than FL-DCX. Interestingly, DCLK1 interacts  
428 with KIF1A also through its N-terminal domain (Lipka et al., 2016). In summary,  
429 interactions between DCX and dynein influence dynein-mediated retrograde transport.

430 Our data further demonstrate that DCX's C-terminal S/P-rich domain decreases  
431 DCX-dynein association, although C-DCX itself does not interact with either dynein or  
432 MTs. Since the DCX C-terminus has several phosphorylation sites (Graham et al., 2004;  
433 Jin et al., 2010; Shmueli et al., 2006; Slepak et al., 2012; Tanaka et al., 2004), it will be  
434 interesting in future studies to determine whether phosphorylation of residues in DCX's C-  
435 terminus regulates the association of DCX with dynein.

436

### 437 **DCX regulates dynein-mediated retrograde transport through JIP3**

438 DCX association with dynein also alters the composition of the dynein motor  
439 complex. In our previous study, we found that the presence/absence of DCX most strongly  
440 altered the amount of the signaling adaptor protein, JIP3, that immunoprecipitated with the  
441 dynein motor complex (Li et al., 2021). In this study, we find that DCX and JIP3  
442 competitively associate with dynein and that a DCX-induced reduction in the association  
443 of JIP3 with dynein results in diminished dynein-mediated retrograde transport. Thus,  
444 when DCX is absent, more dynein motors associate with MTs, and more JIP3 associates  
445 with dynein—events that greatly promote retrograde trafficking.

446 Our previous work also showed that the effects of DCX on the dendritic localization  
447 and patterning of the somatic Golgi apparatus depend on JIP3 and dynein (Li et al., 2021).  
448 Since the relocation of the Golgi apparatus from the soma to dendrites occurs along MTs,  
449 DCX could promote this process by upregulating anterograde and downregulating  
450 retrograde trafficking through its activating effects on KIF1A and its inhibiting effects on  
451 dynein/JIP3, respectively.

452 JIP3 belongs to the JIP family of proteins, which interact with C-Jun N-terminal

453 Kinase (JNK). All mammalian JIP proteins are expressed in the brain (Dickens et al., 1997;  
454 Ito et al., 1999; Kelkar et al., 2000; Kelkar et al., 2005; Yasuda et al., 1999). Sunday Driver,  
455 the JIP3 homolog in *Drosophila*, directly binds to kinesin-1 (Bowman et al., 2000; Byrd et  
456 al., 2001; Sun et al., 2011). UNC16, the JIP3 homolog in *C. elegans*, interacts with both  
457 kinesin-1 and dynein (Byrd et al., 2001). JIP3 colocalizes with the dynein-dynactin motor  
458 complex and serves as an adaptor protein for dynein-mediated retrograde transport of  
459 active JNK and lysosomes (Cavalli et al., 2005; Drerup and Nechiporuk, 2013).

460         The targeted deletion of JIP3 has a similar phenotype to that of *DCX* *-/-*; *Dclk1* *-/-*  
461 mice (Deuel et al., 2006; Fu et al., 2013; Koizumi et al., 2006) with disrupted formation of  
462 the telencephalon and the agenesis of the telencephalic commissures, possibly through  
463 impaired vesicle transport and defects in axon guidance (Ha et al., 2005; Kelkar et al.,  
464 2003). Furthermore, previous studies showed that JIP3 regulates axon branching through  
465 GSK3 $\beta$ -signaling pathway by phosphorylation of DCX at Ser327, which is located at C-  
466 terminal S/P-rich region of DCX (Bilimoria et al., 2010). Therefore, JIP3 might regulate  
467 the association of DCX with dynein through phosphorylation. Since JIP3 is also involved  
468 in kinesin-based transport, it may be a candidate for mediating cross-talk between  
469 anterograde and retrograde motors. A previous study indicates that DCX interacts with  
470 another JIP family protein, c-Jun N-terminal kinase (JNK) interacting protein (JIP1). The  
471 phosphorylation of DCX by the JNK pathway is important for neuronal migration  
472 (Gdalyahu et al., 2004). It will be interesting to explore in future studies whether the  
473 JIP1/JNK pathway is involved in DCX effects on dynein functions.

474

475 **DCX regulates the assembly and motility of the dynein-dynactin-JIP3 motor complex**

476 By reconstituting for the first time the *in vitro* motility of DDJ motor complexes  
477 and by demonstrating—using two-color single-molecule co-localization studies—that DDJ  
478 associates with up to two dyneins, we have revealed that DCX competes with the binding  
479 of the second dynein to DDJ, resulting in reduced velocities of the moving motor  
480 complexes. While numerous dynein-dynactin-adaptor complexes such as DDB, DDR and  
481 DDH have been extensively studied *in vitro* using single-molecule TIRF microscopy  
482 (Christensen et al., 2021; McClintock et al., 2018; McKenney et al., 2014; Sladewski et al.,  
483 2018; Urnavicius et al., 2018), it was the consensus that the predicted ~180 amino acids  $\alpha$ -  
484 helical coiled-coil region in JIP3 is too short to be capable of forming a tripartite complex  
485 with dynein and dynactin (Chaaban and Carter, 2022; Lee et al., 2020; Reck-Peterson et  
486 al., 2018). Surprisingly, however, we found that a truncated JIP3 construct containing the  
487 N-terminal coiled-coil and the predicted adjacent intrinsically disordered domain (amino  
488 acids 1-240) can form an active DDJ complex with two dyneins. N-DCX reduced the  
489 velocity of DDJ complexes with two dyneins from ~0.8  $\mu\text{m/s}$  to ~0.4  $\mu\text{m/s}$  as a result of  
490 the dissociation of the second dynein. That N-DCX's inhibitory effect on DDJ is via  
491 interacting with dynein's tail domain or dynein's associated subunits, but not with dynein's  
492 motor domain or the MTs. The conclusion is supported by the findings that N-DCX, which  
493 does not bind MTs under our assay condition, does not impact the MT-gliding activity by  
494 a tail-truncated single-head dynein (a recombinant construct that contains the motor  
495 domain and the linker), while FL-DCX, which decorates MTs well, reduces the MT-gliding  
496 velocity slightly.

497 The fact that DDJ complexes are active and associate with two dyneins, implies  
498 that either the predicted disordered region in JIP3 following the first  $\alpha$ -helix forms an  $\alpha$ -

499 helical structure (possibly when JIP3 interacts with dynactin and the dynein tail) or that  
500 DDJ associates with two JIP3 molecules as has been recently shown for BICDR1 and Hook  
501 (Chaaban and Carter, 2022). This result contrasts with a previous report that demonstrated  
502 that while a short Hook3 construct could form a stable complex with dynein and dynactin,  
503 the resulting DDH complex was incapable of moving along MTs (Schroeder and Vale,  
504 2016). It is possible that Hook3 and JIP3 differently interact with dynactin and dynein,  
505 which could result in a different degree of activation. Indeed, cryo-EM studies show that  
506 different adaptors bind to dynactin and dynein differently (Urnavicius et al., 2018). These  
507 findings collectively suggest that cargo adaptors fine-tune dynein's activity by utilizing  
508 different interactions with dynein and dynactin. While we also found that a longer JIP3  
509 construct (aa 1-548) formed an active complex with dynein and dynactin (data not shown),  
510 this construct was prone to aggregation. Of note, full-length BicD2 has been shown to be  
511 autoinhibited by its third coiled-coil domain (Hoogenraad et al., 2001; McClintock et al.,  
512 2018). It is therefore possible that also our longer JIP3 construct is more likely to be  
513 autoinhibited. We therefore used the shorter JIP3 construct for our studies. Collectively,  
514 our *in vitro* reconstitution studies with purified proteins agree with our *in vivo* observations  
515 that DCX downregulates dynein's activity, and that the C-terminus of DCX auto-inhibits  
516 DCX's interaction with dynein. Indeed, a recent study has shown that the C-terminus of  
517 DCX facilitates the binding of neighboring DCX molecules to MTs via intermolecular  
518 interactions with DCX's N-terminal domain (Rafiei et al., 2022), which suggests that the  
519 C- and N-terminal domains of DCX have an intrinsic affinity for each other.  
520

521 **How does disinhibition of dynein by DCX-based loss-of-function lead to defects in**  
522 **early neuronal development?**

523 Loss of function mutations in dynein and its co-factors can cause malformations of  
524 cortical development (Feng and Walsh, 2004; Pawlisz et al., 2008; Poirier et al., 2013;  
525 Reiner et al., 1993; Sasaki et al., 2005; Youn et al., 2009). Our study shows for the first  
526 time that abnormally increased dynein function, as observed in mice with DCX knockout,  
527 can also cause defects in development resulting in cortical malformations. Our neuronal  
528 migration studies performed by *in utero* electroporation, shows that diminishing dynein  
529 activity by either knocking down DHC or by decreasing the amount of JIP3 can partially  
530 rescue the defects in *Dcx*<sup>-/-</sup>;*Dclk1*<sup>-/-</sup> mouse cortex. The fact that the rescue is regional and  
531 in the deepest regions of the cortex near the ventricular and subventricular zone implies  
532 that early defects in neural progenitor or neuroblast biology may be preferentially affected  
533 by increased dynein activity in mice with lacking DCX. When dynein activity is  
534 abnormally and globally increased, precise spatial regulation of motor function is lost in  
535 neural progenitors and neurons, which may have effects on cell-biological functions  
536 mediated by dynein, including progenitor cell division, nucleokinesis, and polarized  
537 transport of signaling molecules (Roberts et al., 2013; Tsai et al., 2010; Vale, 2003).

538 Therefore, loss of dynein inhibition may have direct effects on important signal  
539 transduction pathways from distal neuronal processes, including neurotrophin (BDNF)  
540 (Bhattacharyya et al., 2002) and mitogen activated protein kinase signaling via JNK (Rishal  
541 and Fainzilber, 2014). JIP3 is known to bind dynein upon JNK activation and is, thus, an  
542 important mediator of the mitogen activated protein kinases (Drerup and Nechiporuk,  
543 2013). While JIP3's effects on BDNF signaling have not been appreciated previously, JIP3



544 enhanced retrograde transport of the canonical BDNF cargo, TrkB, is consistent with the  
545 known cross-talk between neurotrophic and mitogen-activated protein kinase signaling  
546 (Huang et al., 2011). Alternatively, JIP3 may be a more general dynein cofactor for  
547 mediating retrograde trafficking. While DCX's effects on dynein and JIP3 occur  
548 predominantly in development, the activity of other DCX-family proteins, which are  
549 expressed in mature neurons (Reiner et al., 2006), have important consequences for  
550 understanding neuron-specific signaling that extend beyond development to degeneration,  
551 injury, and repair.

552 Dynein and KIF1A regulate apically-directed or basally-directed nuclear  
553 movement, respectively, of radial glial progenitor cells (Tsai et al., 2010). It is suggested  
554 that DCX mediates KIF1A's effect on basally-directed nuclear movement through the  
555 BDNF pathway (Carabalona et al., 2016), while influencing dynein's role in apically-  
556 directed nuclear movement through regulating the perinuclear MT structure (Tanaka et al.,  
557 2004). Based on our results in this study, DCX might also regulate nuclear migration  
558 through influencing the balance of KIF1A/dynein-mediated anterograde/retrograde  
559 transport via its regulation of JIP3 association with the two motors. Further studies are  
560 needed to prove this.

561

562

563 **AUTHOR CONTRIBUTIONS**

564 X.F., J.S.L., L.R., and A. G. conceived and designed this study, assisted with data analysis  
565 and interpretation, and wrote the manuscript. X.F. and P.L. performed time-lapse imaging,  
566 immunoprecipitation, western analysis, pull-down assays, and related data analysis. Q.W.  
567 performed in pull-down assays. In utero electroporations were performed and analyzed by  
568 P.L., X.F., and A.S.. L.R. generated and purified JIP3 and DCX-ybbR constructs, and  
569 performed the *in vitro* TIRF motility assays and related data analyses. X. L. expressed and  
570 purified tail-truncated and full-length human dynein.

571

572 **ACKNOWLEDGEMENTS**

573 The authors thank Lisa Baker and Julian Curiel for help with the editing the manuscript.  
574 L.R. and A.G thank Andrew Carter (LMB Cambridge) for generously providing purified  
575 porcine brain dynactin. This work was supported by the Brain and Behavior Research  
576 Foundation (J.S.L. and M.T.), the Whitehall Foundation (J.S.L.), the National Natural  
577 Science Foundation of China (81971425 and 81871035) (X.F. and P.L.), the Zhejiang  
578 Provincial Natural Science Foundation of China (LZ09H090001 and LY20H040002) (P.L.  
579 and X.F.), the National Institute of Health (NIH) grants R01GM098469 and R01NS114636  
580 (L.R, X.L. and A.G.), and the NIH grant RO1NS104428-01 (J.S.L.).

581

582 **DECLARATION OF INTERESTS**

583 The authors declare no competing interests.

584

585

## 586 REFERENCES

- 587 Arimoto, M., Koushika, S.P., Choudhary, B.C., Li, C., Matsumoto, K., and Hisamoto, N.  
588 (2011). The *Caenorhabditis elegans* JIP3 protein UNC-16 functions as an adaptor to  
589 link kinesin-1 with cytoplasmic dynein. *J Neurosci* *31*, 2216-2224.
- 590 Bechstedt, S., and Brouhard, G.J. (2012). Doublecortin recognizes the 13-  
591 protofilament microtubule cooperatively and tracks microtubule ends. *Dev Cell* *23*,  
592 181-192.
- 593 Belyy, V., Schlager, M.A., Foster, H., Reimer, A.E., Carter, A.P., and Yildiz, A. (2016). The  
594 mammalian dynein-dynactin complex is a strong opponent to kinesin in a tug-of-war  
595 competition. *Nat Cell Biol* *18*, 1018-1024.
- 596 Bhattacharyya, A., Watson, F.L., Pomeroy, S.L., Zhang, Y.Z., Stiles, C.D., and Segal, R.A.  
597 (2002). High-resolution imaging demonstrates dynein-based vesicular transport of  
598 activated Trk receptors. *J Neurobiol* *51*, 302-312.
- 599 Bilimoria, P.M., de la Torre-Ubieta, L., Ikeuchi, Y., Becker, E.B., Reiner, O., and Bonni, A.  
600 (2010). A JIP3-Regulated GSK3 $\beta$ /DCX Signaling Pathway Restricts Axon  
601 Branching. *J Neurosci* *30*, 16766-16776.
- 602 Bowman, A.B., Kamal, A., Ritchings, B.W., Philp, A.V., McGrail, M., Gindhart, J.G., and  
603 Goldstein, L.S. (2000). Kinesin-dependent axonal transport is mediated by the sunday  
604 driver (SYD) protein. *Cell* *103*, 583-594.
- 605 Budaitis, B.G., Jariwala, S., Rao, L., Yue, Y., Sept, D., Verhey, K.J., and Gennerich, A.  
606 (2021). Pathogenic mutations in the kinesin-3 motor KIF1A diminish force  
607 generation and movement through allosteric mechanisms. *J Cell Biol* *220*.
- 608 Byrd, D.T., Kawasaki, M., Walcoff, M., Hisamoto, N., Matsumoto, K., and Jin, Y. (2001).  
609 UNC-16, a JNK-signaling scaffold protein, regulates vesicle transport in *C. elegans*.  
610 *Neuron* *32*, 787-800.
- 611 Canty, J.T., and Yildiz, A. (2020). Activation and Regulation of Cytoplasmic Dynein.  
612 *Trends Biochem Sci* *45*, 440-453.
- 613 Carabalona, A., Hu, D.J., and Vallee, R.B. (2016). KIF1A inhibition immortalizes brain  
614 stem cells but blocks BDNF-mediated neuronal migration. *Nat Neurosci* *19*, 253-262.
- 615 Cavalli, V., Kujala, P., Klumperman, J., and Goldstein, L.S. (2005). Sunday Driver links  
616 axonal transport to damage signaling. *J Cell Biol* *168*, 775-787.
- 617 Celestino, R., Gama, J.B., Castro-Rodrigues, A.F., Barbosa, D.J., d'Amico, E.A., Musacchio,  
618 A., Carvalho, A.X., Morais-Cabral, J.H., and Gassmann, R. (2021). JIP3 regulates bi-  
619 directional organelle transport in neurons through its interaction with dynein and  
620 kinesin-1. *bioRxiv* *2021.10.11.463801*.
- 621 Chaaban, S., and Carter, A.P. (2022). Structure of dynein-dynactin on microtubules  
622 shows tandem recruitment of cargo adaptors. *bioRxiv* *2022.03.17.482250*.
- 623 Chowdhury, S., Ketcham, S.A., Schroer, T.A., and Lander, G.C. (2015). Structural  
624 organization of the dynein-dynactin complex bound to microtubules. *Nat Struct Mol*  
625 *Biol* *22*, 345-347.
- 626 Christensen, J.R., Kendrick, A.A., Truong, J.B., Aguilar-Maldonado, A., Adani, V.,  
627 Dzieciatkowska, M., and Reck-Peterson, S.L. (2021). Cytoplasmic dynein-1 cargo  
628 diversity is mediated by the combinatorial assembly of FTS-Hook-FHIP complexes.  
629 *Elife* *10*.

630 des Portes, V., Pinard, J.M., Billuart, P., Vinet, M.C., Koulakoff, A., Carrie, A., Gelot, A.,  
631 Dupuis, E., Motte, J., Berwald-Netter, Y., *et al.* (1998). A novel CNS gene required for  
632 neuronal migration and involved in X-linked subcortical laminar heterotopia and  
633 lissencephaly syndrome. *Cell* 92, 51-61.

634 DeSantis, M.E., Cianfrocco, M.A., Htet, Z.M., Tran, P.T., Reck-Peterson, S.L., and  
635 Leschziner, A.E. (2017). Lis1 Has Two Opposing Modes of Regulating Cytoplasmic  
636 Dynein. *Cell* 170, 1197-1208 e1112.

637 Deuel, T.A., Liu, J.S., Corbo, J.C., Yoo, S.Y., Rorke-Adams, L.B., and Walsh, C.A. (2006).  
638 Genetic interactions between doublecortin and doublecortin-like kinase in neuronal  
639 migration and axon outgrowth. *Neuron* 49, 41-53.

640 Dickens, M., Rogers, J.S., Cavanagh, J., Raitano, A., Xia, Z., Halpern, J.R., Greenberg, M.E.,  
641 Sawyers, C.L., and Davis, R.J. (1997). A cytoplasmic inhibitor of the JNK signal  
642 transduction pathway. *Science* 277, 693-696.

643 Dobyns, W.B., Stratton, R.F., and Greenberg, F. (1984). Syndromes with lissencephaly.  
644 I: Miller-Dieker and Norman-Roberts syndromes and isolated lissencephaly. *Am J*  
645 *Med Genet* 18, 509-526.

646 Drerup, C.M., and Nechiporuk, A.V. (2013). JNK-interacting protein 3 mediates the  
647 retrograde transport of activated c-Jun N-terminal kinase and lysosomes. *PLoS Genet*  
648 9, e1003303.

649 Elshenawy, M.M., Canty, J.T., Oster, L., Ferro, L.S., Zhou, Z., Blanchard, S.C., and Yildiz,  
650 A. (2019). Cargo adaptors regulate stepping and force generation of mammalian  
651 dynein-dynactin. *Nat Chem Biol* 15, 1093-1101.

652 Ettinger, A., van Haren, J., Ribeiro, S.A., and Wittmann, T. (2016). Doublecortin Is  
653 Excluded from Growing Microtubule Ends and Recognizes the GDP-Microtubule  
654 Lattice. *Curr Biol* 26, 1549-1555.

655 Feng, Y., and Walsh, C.A. (2004). Mitotic spindle regulation by Nde1 controls cerebral  
656 cortical size. *Neuron* 44, 279-293.

657 Fourniol, F.J., Sindelar, C.V., Amigues, B., Clare, D.K., Thomas, G., Perderiset, M., Francis,  
658 F., Houdusse, A., and Moores, C.A. (2010). Template-free 13-protofilament  
659 microtubule-MAP assembly visualized at 8 Å resolution. *J Cell Biol* 191, 463-470.

660 Francis, F., Koulakoff, A., Boucher, D., Chafey, P., Schaar, B., Vinet, M.C., Friocourt, G.,  
661 McDonnell, N., Reiner, O., Kahn, A., *et al.* (1999). Doublecortin is a developmentally  
662 regulated, microtubule-associated protein expressed in migrating and differentiating  
663 neurons. *Neuron* 23, 247-256.

664 Fu, X., Brown, K.J., Yap, C.C., Winckler, B., Jaiswal, J.K., and Liu, J.S. (2013). Doublecortin  
665 (Dcx) family proteins regulate filamentous actin structure in developing neurons. *J*  
666 *Neurosci* 33, 709-721.

667 Gdalyahu, A., Ghosh, I., Levy, T., Sapir, T., Sapoznik, S., Fishler, Y., Azoulai, D., and  
668 Reiner, O. (2004). DCX, a new mediator of the JNK pathway. *EMBO J* 23, 823-832.

669 Gennerich, A., and Schild, D. (2006). Finite-particle tracking reveals submicroscopic-  
670 size changes of mitochondria during transport in mitral cell dendrites. *Phys Biol* 3,  
671 45-53.

672 Gibson, J.M., Cui, H., Ali, M.Y., Zhao, X., Debler, E.W., Zhao, J., Trybus, K.M., Solmaz, S.R.,  
673 and Wang, C. (2022). Coil-to-alpha-helix transition at the Nup358-BicD2 interface  
674 activates BicD2 for dynein recruitment. *Elife* 11.

675 Gleeson, J.G., Allen, K.M., Fox, J.W., Lamperti, E.D., Berkovic, S., Scheffer, I., Cooper, E.C.,  
676 Dobyns, W.B., Minnerath, S.R., Ross, M.E., *et al.* (1998). Doublecortin, a brain-specific  
677 gene mutated in human X-linked lissencephaly and double cortex syndrome, encodes  
678 a putative signaling protein. *Cell* 92, 63-72.

679 Graham, M.E., Ruma-Haynes, P., Capes-Davis, A.G., Dunn, J.M., Tan, T.C., Valova, V.A.,  
680 Robinson, P.J., and Jeffrey, P.L. (2004). Multisite phosphorylation of doublecortin by  
681 cyclin-dependent kinase 5. *Biochem J* 381, 471-481.

682 Grotjahn, D.A., Chowdhury, S., Xu, Y., McKenney, R.J., Schroer, T.A., and Lander, G.C.  
683 (2018). Cryo-electron tomography reveals that dynactin recruits a team of dyneins  
684 for processive motility. *Nat Struct Mol Biol* 25, 203-207.

685 Ha, H.Y., Cho, I.H., Lee, K.W., Song, J.Y., Kim, K.S., Yu, Y.M., Lee, J.K., Song, J.S., Yang, S.D.,  
686 Shin, H.S., *et al.* (2005). The axon guidance defect of the telencephalic commissures of  
687 the JSAP1-deficient brain was partially rescued by the transgenic expression of JIP1.  
688 *Dev Biol* 277, 184-199.

689 Ha, J., Lo, K.W., Myers, K.R., Carr, T.M., Humsi, M.K., Rasoul, B.A., Segal, R.A., and Pfister,  
690 K.K. (2008). A neuron-specific cytoplasmic dynein isoform preferentially transports  
691 TrkB signaling endosomes. *J Cell Biol* 181, 1027-1039.

692 Heerssen, H.M., Pazyra, M.F., and Segal, R.A. (2004). Dynein motors transport  
693 activated Trks to promote survival of target-dependent neurons. *Nat Neurosci* 7, 596-  
694 604.

695 Hoogenraad, C.C., Akhmanova, A., Howell, S.A., Dortland, B.R., De Zeeuw, C.I.,  
696 Willemsen, R., Visser, P., Grosveld, F., and Galjart, N. (2001). Mammalian Golgi-  
697 associated Bicaudal-D2 functions in the dynein-dynactin pathway by interacting with  
698 these complexes. In *EMBO J*, pp. 4041-4054.

699 Htet, Z.M., Gillies, J.P., Baker, R.W., Leschziner, A.E., DeSantis, M.E., and Reck-Peterson,  
700 S.L. (2020). LIS1 promotes the formation of activated cytoplasmic dynein-1  
701 complexes. *Nat Cell Biol* 22, 518-525.

702 Huang, S.H., Duan, S., Sun, T., Wang, J., Zhao, L., Geng, Z., Yan, J., Sun, H.J., and Chen, Z.Y.  
703 (2011). JIP3 mediates TrkB axonal anterograde transport and enhances BDNF  
704 signaling by directly bridging TrkB with kinesin-1. *J Neurosci* 31, 10602-10614.

705 Ito, M., Yoshioka, K., Akechi, M., Yamashita, S., Takamatsu, N., Sugiyama, K., Hibi, M.,  
706 Nakabeppu, Y., Shiba, T., and Yamamoto, K.I. (1999). JSAP1, a novel jun N-terminal  
707 protein kinase (JNK)-binding protein that functions as a Scaffold factor in the JNK  
708 signaling pathway. *Mol Cell Biol* 19, 7539-7548.

709 Jacobson, C., Schnapp, B., and Banker, G.A. (2006). A change in the selective  
710 translocation of the Kinesin-1 motor domain marks the initial specification of the  
711 axon. *Neuron* 49, 797-804.

712 Jellinger, K., and Rett, A. (1976). Agyria-pachygyria (lissencephaly syndrome).  
713 *Neuropadiatrie* 7, 66-91.

714 Jin, J., Suzuki, H., Hirai, S., Mikoshiba, K., and Ohshima, T. (2010). JNK phosphorylates  
715 Ser332 of doublecortin and regulates its function in neurite extension and neuronal  
716 migration. *Dev Neurobiol* 70, 929-942.

717 Jumper, J., Evans, R., Pritzel, A., Green, T., Figurnov, M., Ronneberger, O.,  
718 Tunyasuvunakool, K., Bates, R., Zidek, A., Potapenko, A., *et al.* (2021). Highly accurate  
719 protein structure prediction with AlphaFold. *Nature* 596, 583-589.



720 Kaplan, A., and Reiner, O. (2011). Linking cytoplasmic dynein and transport of Rab8  
721 vesicles to the midbody during cytokinesis by the doublecortin domain-containing 5  
722 protein. *J Cell Sci* 124, 3989-4000.

723 Kappeler, C., Dhenain, M., Phan Dinh Tuy, F., Saillour, Y., Marty, S., Fallet-Bianco, C.,  
724 Souville, I., Souil, E., Pinard, J.M., Meyer, G., *et al.* (2007). Magnetic resonance imaging  
725 and histological studies of corpus callosal and hippocampal abnormalities linked to  
726 doublecortin deficiency. *J Comp Neurol* 500, 239-254.

727 Keays, D.A., Tian, G., Poirier, K., Huang, G.J., Siebold, C., Cleak, J., Oliver, P.L., Fray, M.,  
728 Harvey, R.J., Molnar, Z., *et al.* (2007). Mutations in alpha-tubulin cause abnormal  
729 neuronal migration in mice and lissencephaly in humans. *Cell* 128, 45-57.

730 Kelkar, N., Delmotte, M.H., Weston, C.R., Barrett, T., Sheppard, B.J., Flavell, R.A., and  
731 Davis, R.J. (2003). Morphogenesis of the telencephalic commissure requires scaffold  
732 protein JNK-interacting protein 3 (JIP3). *Proc Natl Acad Sci U S A* 100, 9843-9848.

733 Kelkar, N., Gupta, S., Dickens, M., and Davis, R.J. (2000). Interaction of a mitogen-  
734 activated protein kinase signaling module with the neuronal protein JIP3. *Mol Cell*  
735 *Biol* 20, 1030-1043.

736 Kelkar, N., Standen, C.L., and Davis, R.J. (2005). Role of the JIP4 scaffold protein in the  
737 regulation of mitogen-activated protein kinase signaling pathways. *Mol Cell Biol* 25,  
738 2733-2743.

739 Koizumi, H., Tanaka, T., and Gleeson, J.G. (2006). Doublecortin-like kinase functions  
740 with doublecortin to mediate fiber tract decussation and neuronal migration. *Neuron*  
741 49, 55-66.

742 Lee, B.J., Kim, J.H., and Yu, Y.S. (2010). Lissencephaly and mild cerebellar vermis  
743 hypoplasia in a case of microcephaly and chorioretinal dysplasia. *Ophthalmic Genet*  
744 31, 89-93.

745 Lee, I.G., Cason, S.E., Alqassim, S.S., Holzbaur, E.L.F., and Dominguez, R. (2020). A  
746 tunable LIC1-adaptor interaction modulates dynein activity in a cargo-specific  
747 manner. *Nat Commun* 11, 5695.

748 Li, P., Li, L., Yu, B., Wang, X., Wang, Q., Lin, J., Zheng, Y., Zhu, J., He, M., Xia, Z., *et al.* (2021).  
749 Doublecortin facilitates the elongation of the somatic Golgi apparatus into proximal  
750 dendrites. *Mol Biol Cell* 32, 422-434.

751 Lipka, J., Kapitein, L.C., Jaworski, J., and Hoogenraad, C.C. (2016). Microtubule-binding  
752 protein doublecortin-like kinase 1 (DCLK1) guides kinesin-3-mediated cargo  
753 transport to dendrites. *EMBO J* 35, 302-318.

754 Liu, J.S., Schubert, C.R., Fu, X., Fourniol, F.J., Jaiswal, J.K., Houdusse, A., Stultz, C.M.,  
755 Moores, C.A., and Walsh, C.A. (2012). Molecular basis for specific regulation of  
756 neuronal kinesin-3 motors by doublecortin family proteins. *Mol Cell* 47, 707-721.

757 Marzo, M.G., Griswold, J.M., and Markus, S.M. (2020). Pac1/LIS1 stabilizes an  
758 uninhibited conformation of dynein to coordinate its localization and activity. *Nat Cell*  
759 *Biol* 22, 559-569.

760 McClintock, M.A., Dix, C.I., Johnson, C.M., McLaughlin, S.H., Maizels, R.J., Hoang, H.T.,  
761 and Bullock, S.L. (2018). RNA-directed activation of cytoplasmic dynein-1 in  
762 reconstituted transport RNPs. *Elife* 7.

763 McKenney, R.J., Huynh, W., Tanenbaum, M.E., Bhabha, G., and Vale, R.D. (2014).  
764 Activation of cytoplasmic dynein motility by dynactin-cargo adapter complexes.  
765 *Science* 345, 337-341.

766 Monroy, B.Y., Tan, T.C., Oclaman, J.M., Han, J.S., Simo, S., Niwa, S., Nowakowski, D.W.,  
767 McKenney, R.J., and Ori-McKenney, K.M. (2020). A Combinatorial MAP Code Dictates  
768 Polarized Microtubule Transport. *Dev Cell* 53, 60-72 e64.

769 Moslehi, M., Ng, D.C.H., and Bogoyevitch, M.A. (2019). Doublecortin X (DCX) serine 28  
770 phosphorylation is a regulatory switch, modulating association of DCX with  
771 microtubules and actin filaments. *Biochim Biophys Acta Mol Cell Res* 1866, 638-649.

772 Olenick, M.A., Tokito, M., Boczkowska, M., Dominguez, R., and Holzbaur, E.L. (2016).  
773 Hook Adaptors Induce Unidirectional Processive Motility by Enhancing the Dynein-  
774 Dynactin Interaction. *J Biol Chem* 291, 18239-18251.

775 Pawlisz, A.S., Mutch, C., Wynshaw-Boris, A., Chenn, A., Walsh, C.A., and Feng, Y. (2008).  
776 Lis1-Nde1-dependent neuronal fate control determines cerebral cortical size and  
777 lamination. *Hum Mol Genet* 17, 2441-2455.

778 Poirier, K., Lebrun, N., Broix, L., Tian, G., Saillour, Y., Boscheron, C., Parrini, E., Valence,  
779 S., Pierre, B.S., Oger, M., *et al.* (2013). Mutations in TUBG1, DYNC1H1, KIF5C and KIF2A  
780 cause malformations of cortical development and microcephaly. *Nat Genet* 45, 639-  
781 647.

782 Potokar, M., Stenovec, M., Gabrijel, M., Li, L., Kreft, M., Grilc, S., Pekny, M., and Zorec, R.  
783 (2010). Intermediate filaments attenuate stimulation-dependent mobility of  
784 endosomes/lysosomes in astrocytes. In *Glia*, pp. 1208-1219.

785 Pramparo, T., Youn, Y.H., Yingling, J., Hirotsune, S., and Wynshaw-Boris, A. (2010).  
786 Novel embryonic neuronal migration and proliferation defects in Dcx mutant mice  
787 are exacerbated by Lis1 reduction. *J Neurosci* 30, 3002-3012.

788 Rafiei, A., Cruz Tetlalmatzi, S., Edrington, C.H., Lee, L., Crowder, D.A., Saltzberg, D.J.,  
789 Sali, A., Brouhard, G., and Schriemer, D.C. (2022). Doublecortin engages the  
790 microtubule lattice through a cooperative binding mode involving its C-terminal  
791 domain. *Elife* 11.

792 Rao, L., Berger, F., Nicholas, M.P., and Gennerich, A. (2019). Molecular mechanism of  
793 cytoplasmic dynein tension sensing. *Nat Commun* 10, 3332.

794 Rao, L., Hulsemann, M., and Gennerich, A. (2018). Combining Structure-Function and  
795 Single-Molecule Studies on Cytoplasmic Dynein. *Methods Mol Biol* 1665, 53-89.

796 Reck-Peterson, S.L., Redwine, W.B., Vale, R.D., and Carter, A.P. (2018). The cytoplasmic  
797 dynein transport machinery and its many cargoes. *Nat Rev Mol Cell Biol* 19, 382-398.

798 Reiner, O. (2013). LIS1 and DCX: Implications for Brain Development and Human  
799 Disease in Relation to Microtubules. *Scientifica (Cairo)* 2013, 393975.

800 Reiner, O., Carrozzo, R., Shen, Y., Wehnert, M., Faustinella, F., Dobyns, W.B., Caskey,  
801 C.T., and Ledbetter, D.H. (1993). Isolation of a Miller-Dieker lissencephaly gene  
802 containing G protein beta-subunit-like repeats. *Nature* 364, 717-721.

803 Reiner, O., Coquelle, F.M., Peter, B., Levy, T., Kaplan, A., Sapir, T., Orr, I., Barkai, N.,  
804 Eichele, G., and Bergmann, S. (2006). The evolving doublecortin (DCX) superfamily.  
805 *BMC Genomics* 7, 188.

806 Rezaul, K., Gupta, D., Semenova, I., Ikeda, K., Kraikivski, P., Yu, J., Cowan, A., Zaliapin, I.,  
807 and Rodionov, V. (2016). Engineered Tug-of-War Between Kinesin and Dynein  
808 Controls Direction of Microtubule Based Transport In Vivo. *Traffic* 17, 475-486.

809 Rishal, I., and Fainzilber, M. (2014). Axon-soma communication in neuronal injury.  
810 *Nat Rev Neurosci* 15, 32-42.

811 Roberts, A.J., Kon, T., Knight, P.J., Sutoh, K., and Burgess, S.A. (2013). Functions and  
812 mechanics of dynein motor proteins. *Nat Rev Mol Cell Biol* 14, 713-726.

813 Sarker, K.P., Wilson, S.M., and Bonni, S. (2005). SnoN is a cell type-specific mediator  
814 of transforming growth factor-beta responses. *J Biol Chem* 280, 13037-13046.

815 Sasaki, S., Mori, D., Toyo-oka, K., Chen, A., Garrett-Beal, L., Muramatsu, M., Miyagawa,  
816 S., Hiraiwa, N., Yoshiki, A., Wynshaw-Boris, A., *et al.* (2005). Complete loss of Ndel1  
817 results in neuronal migration defects and early embryonic lethality. *Mol Cell Biol* 25,  
818 7812-7827.

819 Schaar, B.T., Kinoshita, K., and McConnell, S.K. (2004). Doublecortin microtubule  
820 affinity is regulated by a balance of kinase and phosphatase activity at the leading  
821 edge of migrating neurons. *Neuron* 41, 203-213.

822 Schlager, M.A., Hoang, H.T., Urnavicius, L., Bullock, S.L., and Carter, A.P. (2014). In vitro  
823 reconstitution of a highly processive recombinant human dynein complex. *EMBO J* 33,  
824 1855-1868.

825 Schroeder, C.M., and Vale, R.D. (2016). Assembly and activation of dynein-dynactin by  
826 the cargo adaptor protein Hook3. *J Cell Biol* 214, 309-318.

827 Shmueli, A., Gdalyahu, A., Sapoznik, S., Sapir, T., Tsukada, M., and Reiner, O. (2006).  
828 Site-specific dephosphorylation of doublecortin (DCX) by protein phosphatase 1  
829 (PP1). *Mol Cell Neurosci* 32, 15-26.

830 Sladewski, T.E., Billington, N., Ali, M.Y., Bookwalter, C.S., Lu, H., Kremntsova, E.B.,  
831 Schroer, T.A., and Trybus, K.M. (2018). Recruitment of two dyneins to an mRNA-  
832 dependent Bicaudal D transport complex. *Elife* 7.

833 Slepak, T.I., Salay, L.D., Lemmon, V.P., and Bixby, J.L. (2012). Dyrk kinases regulate  
834 phosphorylation of doublecortin, cytoskeletal organization, and neuronal  
835 morphology. *Cytoskeleton (Hoboken)* 69, 514-527.

836 Splinter, D., Razafsky, D.S., Schlager, M.A., Serra-Marques, A., Grigoriev, I., Demmers,  
837 J., Keijzer, N., Jiang, K., Poser, I., Hyman, A.A., *et al.* (2012). BICD2, dynactin, and LIS1  
838 cooperate in regulating dynein recruitment to cellular structures. *In Mol Biol Cell*, pp.  
839 4226-4241.

840 Sun, F., Zhu, C., Dixit, R., and Cavalli, V. (2011). Sunday Driver/JIP3 binds kinesin heavy  
841 chain directly and enhances its motility. *EMBO J* 30, 3416-3429.

842 Tanaka, T., Serneo, F.F., Higgins, C., Gambello, M.J., Wynshaw-Boris, A., and Gleeson,  
843 J.G. (2004). Lis1 and doublecortin function with dynein to mediate coupling of the  
844 nucleus to the centrosome in neuronal migration. *J Cell Biol* 165, 709-721.

845 Taylor, K.R., Holzer, A.K., Bazan, J.F., Walsh, C.A., and Gleeson, J.G. (2000). Patient  
846 mutations in doublecortin define a repeated tubulin-binding domain. *J Biol Chem* 275,  
847 34442-34450.

848 Torisawa, T., Ichikawa, M., Furuta, A., Saito, K., Oiwa, K., Kojima, H., Toyoshima, Y.Y.,  
849 and Furuta, K. (2014). Autoinhibition and cooperative activation mechanisms of  
850 cytoplasmic dynein. *Nat Cell Biol* 16, 1118-1124.

851 Toropova, K., Mladenov, M., and Roberts, A.J. (2017). Intraflagellar transport dynein  
852 is autoinhibited by trapping of its mechanical and track-binding elements. *Nat Struct*  
853 *Mol Biol* 24, 461-468.

854 Trokter, M., Mücke, N., and Surrey, T. (2012). Reconstitution of the human  
855 cytoplasmic dynein complex. *Proc Natl Acad Sci USA* 109, 20895-20900.



856 Tsai, J.W., Lian, W.N., Kemal, S., Kriegstein, A.R., and Vallee, R.B. (2010). Kinesin 3 and  
857 cytoplasmic dynein mediate interkinetic nuclear migration in neural stem cells. *Nat*  
858 *Neurosci* *13*, 1463-1471.

859 Urnavicius, L., Lau, C.K., Elshenawy, M.M., Morales-Rios, E., Motz, C., Yildiz, A., and  
860 Carter, A.P. (2018). Cryo-EM shows how dynactin recruits two dyneins for faster  
861 movement. *Nature* *554*, 202-206.

862 Urnavicius, L., Zhang, K., Diamant, A.G., Motz, C., Schlager, M.A., Yu, M., Patel, N.A.,  
863 Robinson, C.V., and Carter, A.P. (2015). The structure of the dynactin complex and its  
864 interaction with dynein. *Science* *347*, 1441-1446.

865 Vale, R.D. (2003). The molecular motor toolbox for intracellular transport. *Cell* *112*,  
866 467-480.

867 Vallee, R.B., McKenney, R.J., and Ori-McKenney, K.M. (2012). Multiple modes of  
868 cytoplasmic dynein regulation. *Nat Cell Biol* *14*, 224-230.

869 Yano, H., Lee, F.S., Kong, H., Chuang, J., Arevalo, J., Perez, P., Sung, C., and Chao, M.V.  
870 (2001). Association of Trk neurotrophin receptors with components of the  
871 cytoplasmic dynein motor. *J Neurosci* *21*, RC125.

872 Yap, C.C., Vakulenko, M., Kruczek, K., Motamedi, B., Digilio, L., Liu, J.S., and Winckler, B.  
873 (2012). Doublecortin (DCX) mediates endocytosis of neurofascin independently of  
874 microtubule binding. *J Neurosci* *32*, 7439-7453.

875 Yasuda, J., Whitmarsh, A.J., Cavanagh, J., Sharma, M., and Davis, R.J. (1999). The JIP  
876 group of mitogen-activated protein kinase scaffold proteins. *Mol Cell Biol* *19*, 7245-  
877 7254.

878 Yin, J., Lin, A.J., Golan, D.E., and Walsh, C.T. (2006). Site-specific protein labeling by Sfp  
879 phosphopantetheinyl transferase. *Nat Protoc* *1*, 280-285.

880 Youn, Y.H., Pramparo, T., Hirotsumi, S., and Wynshaw-Boris, A. (2009). Distinct dose-  
881 dependent cortical neuronal migration and neurite extension defects in Lis1 and  
882 Ndel1 mutant mice. *J Neurosci* *29*, 15520-15530.

883 Zhang, K., Foster, H.E., Rondelet, A., Lacey, S.E., Bahi-Buisson, N., Bird, A.W., and Carter,  
884 A.P. (2017). Cryo-EM Reveals How Human Cytoplasmic Dynein Is Auto-inhibited and  
885 Activated. *Cell* *169*, 1303-1314.

886 Zhou, B., Cai, Q., Xie, Y., and Sheng, Z.H. (2012). Snapin recruits dynein to BDNF-TrkB  
887 signaling endosomes for retrograde axonal transport and is essential for dendrite  
888 growth of cortical neurons. *Cell Rep* *2*, 42-51.

889

890

## 891 **EXPERIMENTAL PROCEDURES**

### 892 **Antibodies and Reagents**

893 Cell culture reagents were purchased from Life Technologies (Grand Island, NY).  
894 Antibodies to DCX (ab18723), DHC (ab6305), DIC (ab23905), and Tubulin (ab6161) are  
895 purchased from Abcam (Cambridge, MA). Antibody to JIP3 is from Santa Cruz  
896 Biotechnology (Dallas, TX). Antibody to HA is from EMD Millipore (Billerica, MA).  
897 Construct expressing IC-1B is generously provided from Dr. Kevin Pfister (UVA).  
898 Construct expression JIP3 is generously provided from Dr. Roger Davis (UMASS MED).  
899 Construct expression TrkB-RFP is generously provided from Dr. Xiaowei Zhuang  
900 (Harvard University). All other reagents are purchased from Sigma-Aldrich (St. Louis,  
901 MO).

902

### 903 **Mammalian expression and RNA interference constructs**

904 DNA sequences for HA-tagged N-DCX (1-270 N-terminal amino acids) and C-  
905 DCX (271-361 amino acids) are synthesized by PCR using construct expressing FL-DCX  
906 (Liu et al., 2012) as template, and then cloned into plasmid pBA (Jacobson et al., 2006).  
907 HA-tagged DCX mutant T203R were created using QuikChange Site-Directed  
908 Mutagenesis kit (Stratagene). HA-tagged DCX mutant A71S was synthesized  
909 commercially (Genewiz) and subcloned into plasmid pBA. All RNAi control or target  
910 sequences (hp) were cloned into the pSilencer 1.0-U6 plasmid. The complementary  
911 RNAi oligos were annealed and ligated into pSilencer-GFP (gift from Shirin Bonni)  
912 (Sarker et al., 2005).

913

914 **Animals and Primary Cortical Neuron Cultures**

915 All animal procedures were approved by the Committee on the Ethics of Animal  
916 Experiments of Wenzhou Medical University (#wydw2019-0723). P0 cortices were  
917 dissected and dissociated using the Worthington papain dissociation system (Worthington  
918 Biochemical Corp., Lakewood, NJ). Neurons were plated on Poly-L-ornithine solution  
919 coated coverglasses in neuronal culture medium (Neurobasal medium plus B27, Glutamine,  
920 FGF (10ug/ml) and Pen/Strep) until experiments.

921

922 **Time-Lapse Imaging**

923 Cultured cortical neurons were transfected with different constructs on DIV6 using  
924 Lipofectamine 2000 according to manufacturer's instruction. Images were acquired on an  
925 inverted epifluorescence microscope (IX-81, Olympus America Inc., Melville, NY)  
926 equipped with high numerical aperture lenses (Apo 603 NA 1.45, Olympus) and a stage  
927 top incubator (Tokaihit, Japan) maintained at 37 °C at a rate of one capture per 3 seconds.  
928 Fluorescence excitation was carried out using solid-state lasers (Melles Griot, Carlsbad,  
929 CA) emitting at 488 nm (for green) and 561 nm (for red) fluorophores. Emission was  
930 collected through appropriate emission band-pass filters obtained from Chroma  
931 Technologies Corp. (Brattleboro, VT). Images were acquired with a 12-bit cooled CCD  
932 ORCA-ER (Hamamatsu Photonics) with a resolution of 1280 x 1024 pixels (pixel size =  
933 6.45 μm<sup>2</sup>). The camera, lasers, and shutters were all controlled using Slidebook 5  
934 (Intelligent Imaging Innovations, Denver, CO). For all calculations and measurements of  
935 vesicle movement, only bright vesicles located in the proximal region of axons (~100 μm  
936 away from cell body) are analyzed. A vesicle is counted as mobile only if the displacement

937 is at least 5  $\mu\text{m}$ . A vesicle is counted as stationary if moves less than 5  $\mu\text{m}$ . To calculate  
938 the run length and velocity, vesicles were analyzed only if the net run length is at least 5  
939  $\mu\text{m}$  in retrograde direction. The velocity is calculated as: the length of a continuous  
940 retrograde movement divided by the length of the time. Those stationary vesicles are not  
941 counted for velocity. Analysis of timelapse imaging was performed with MetaMorph for  
942 tracking and the ImageJ Manual Tracking plugin as described  
943 (<http://rsbweb.nih.gov/ij/plugins/track/track.html>).

#### 944 **Pull-down Assay and Mass Spectrometry procedure and analysis**

945 HA or HA-tagged DCX proteins were immobilized on Anti-HA agarose beads and  
946 subsequently mixed with protein lysates from embryonic day-18 mouse brains and  
947 incubated with rotation for 16 h at 4  $^{\circ}\text{C}$  to pull down associating proteins. The beads were  
948 washed four times. The beads were then incubated with DTT solution (final concentration  
949 of 10 mmol/L) and reduced in a 56  $^{\circ}\text{C}$  water bath for 1 h. IAA solution was added (final  
950 concentration of 50 mmol/L) and protected from light for 40 min. The proteins were  
951 digested with trypsin overnight at 37 $^{\circ}\text{C}$ . After digestion, the peptides were desalted using  
952 a desalting column, and the solvent was evaporated in a vacuum centrifuge at 45  $^{\circ}\text{C}$ . The  
953 peptides were dissolved in sample solution (0.1% formic acid in water) and ready for mass  
954 spectrometry analysis. Samples were loaded onto Nanocolumn (100  $\mu\text{m}\times 10\text{ cm}$ ) packed  
955 with a reversed-phase ReproSil-Pur C18-AQ resin (3  $\mu\text{m}$ , 120  $\text{\AA}$ , Dr. Maisch GmbH,  
956 Germany). The mobile phases consisted of A (0.1% formic acid in water) and B  
957 (acetonitrile). Total flow rate is 600 nL/min using a nanoflow liquid chromatograph (Easy-  
958 nLC1000, ThermoFisher Scientific, USA). LC linear gradient: from 4% to 8% B for 2 min,  
959 from 8% to 28 % B for 43 min, from 28 % to 40% B for 10 min, from 40% to 95% B for

960 1 min and from 95% to 95% B for 10 min. Eluted peptides were introduced into the mass  
961 spectrometer (Q Exactive™ Hybrid Quadrupole-Orbitrap™ Mass Spectrometer, Thermo  
962 Fisher Scientific, USA). The spray voltage was set at 2.2 kV and the heated capillary at  
963 270°C. The machine was operated with MS resolution at 70000 (400 m/z survey scan), MS  
964 precursor m/z range: 300.0-1800.0. The raw MS files were analyzed and searched against  
965 protein database based on the species of the samples using MaxQuant (1.6.2.10). The  
966 parameters were set as follows: the protein modifications were carbamidomethylation (C)  
967 (fixed), oxidation (M) (variable), Acetyl (Protein N-term) (variable); the enzyme  
968 specificity was set to trypsin; the maximum missed cleavages were set to 2; the precursor  
969 ion mass tolerance was set to 20 ppm, and MS/MS tolerance was 20 ppm. Only high  
970 confident identified peptides were chosen for downstream protein identification analysis.  
971 RIPA Lysis and Extraction Buffer, Pierce™ BCA Protein Assay Kit were purchased from  
972 Thermo Fisher Science. DL-dithiothreitol (DTT), iodoacetamide (IAA), formic acid (FA),  
973 acetonitrile (ACN), were purchased from Sigma (St. Louis, MO, USA), trypsin from  
974 bovine pancreas was purchased from Promega (Madison, WI, USA). Ultrapure water was  
975 prepared from a Millipore purification system (Billerica, MA, USA). An Ultimate 3000  
976 system coupled with a Q Exactive™ Hybrid Quadrupole-Orbitrap™ Mass Spectrometer  
977 (Thermo Fisher Scientific, USA) with an ESI nanospray source.

#### 978 **Microtubule-binding assay**

979 Mouse brains are dissected and flash frozen and kept at -80 °C until experiment.  
980 Flash frozen mouse brains are pulverized with a mortar and pestle and added to cold lysis  
981 buffer (0.01% Triton X100, 1x proteinase and phosphatase inhibitor cocktail, 1mM GTP in  
982 1x BRB80 buffer) and left on ice for 20 minutes. Proteins are collected in the supernatant

983 after centrifugation for 20 min at 15000 rpm. Tubulin (Cytoskeleton, Inc) is diluted to  
984 10mg/ml in lysis buffer and incubated at 37 °C for 30 minutes, 100 μM taxol was added  
985 afterwards. Equal amounts of proteins from different mouse brains are warmed up to 37  
986 °C and incubated with polymerized microtubules at 37 °C for 1 hour. Samples are  
987 centrifuged at 100,000x g at 37 °C for 40 minutes. Supernatants are saved and pellets are  
988 re-suspended in lysis buffer of the same volume of supernatant.

989

### 990 ***In Utero* Electroporation**

991 *In utero* electroporation-mediated gene transfer was performed as previously  
992 described (Saito and Nakatsuji 2001; Tabata and Nakajima 2001). Briefly, E14.5 pregnant  
993 mice were anesthetized with ketamine/xylazine (100/10 mg/kg) and their uterine horn  
994 exposed. DNA plasmid (2-5 mg/ml) was injected via a pulled glass pipette into the lateral  
995 ventricle of each embryo, followed by electrodes placed on each side of the head parallel  
996 to the sagittal plane. Electrical current (five 50 ms pulses of 41 V with 950 ms intervals)  
997 was used to drive the plasmid DNA into lateral cortical areas. After sacrifice, mice were  
998 screened through visualizing of GFP expression using a stereo fluorescence microscope.  
999 GFP expressing mouse brains are dissected out and fixed in 3.7% paraformaldehyde for 3  
1000 hours. Samples are then transferred to PBS buffer with 30% sucrose and left at 4°C  
1001 overnight. The mouse brains are sectioned at 20 μm using a Microtome (MICROM  
1002 HM525).

1003

### 1004 **Western Analysis**

1005 Standard Western Blot analysis was performed using antibodies, as detailed above.  
1006 The dual channel signal detection Licor system from Odyssey was used to analyze levels  
1007 over a linear dynamic range.

1008

### 1009 **Constructs for protein expression in *E. coli***

1010 The plasmids for 6His-PreScission-DCX-EGFP-StrepII (AddGene #83918),  
1011 kif5b(1-560)-EGFP-6His (AddGene #15219), and Sfp-6His (AddGene #75015) were  
1012 ordered from AddGene. The plasmid for JIP3 was a gift from Cavalli lab (Valeria Cavalli,  
1013 Department of Anatomy and Neurobiology, Washington University in St Louis, School of  
1014 Medicine, St Louis, MO, USA) (Sun et al., 2011). For DCX, EGFP was replaced by a  
1015 ybbR-tag using Q5 mutagenesis (NEB #). For kif5b, the sequence encoding amino acids  
1016 1-490 was amplified with NdeI and EcoRI overhangs and inserted into a modified  
1017 backbone based on pSNAP-tag(T7)2 (NEB #N9181S) before a SNAPf-EGFP-6His tag  
1018 (Budaitis et al., 2021). For JIP3, the sequence encoding amino acids 3-240 (or 3-548) was  
1019 amplified with NdeI-6His and EcoRI overhangs. The first two amino acids are Met in JIP3,  
1020 which were therefore skipped because a 6His-tag was inserted at the N-terminus. The  
1021 amplified sequence was then inserted into a modified backbone based on pSNAP-tag(T7)2  
1022 before a HaloTag-StrepII tag. All constructs were verified by restriction enzyme digestion  
1023 and DNA sequencing.

1024

### 1025 **Protein expression in *E. coli***

1026 Protein expression in *E. coli* was done as previously described (Budaitis et al.,  
1027 2021). Briefly, a plasmid was transformed into BL21-CodonPlus(DE3)-RIPL competent

1028 cells (Agilent #230280), and a single colony was inoculated in 1 mL of TB with 50 µg/mL  
1029 of chloroamphenicol and 25 µg/mL of carbenicillin or 15 µg/mL of kanamycin in the case  
1030 of Sfp. The culture was shaken at 37°C overnight, and then inoculated into 400 mL of TB,  
1031 which was shaken at 37°C for 5 hours, and subsequently cooled down to 18°C. IPTG was  
1032 added to the culture to a final concentration of 0.1 mM, and the expression was induced  
1033 overnight at 18°C with shaking. The culture was harvested by centrifugation at 3000 rcf  
1034 for 10 minutes. Following the removal of the supernatant, the cell pellet was resuspended  
1035 in 5 mL of B-PER complete (ThermoScientific #89821) supplemented with 4 mM MgCl<sub>2</sub>,  
1036 2 mM EGTA, 0.2 mM ATP, 2 mM DTT, and 2 mM PMSF. The cell suspension was then  
1037 flash frozen and stored at -80°C.

1038

### 1039 **Purification and labeling of Sfp, JIP3, DCX, and KIF5B**

1040 The purification of *E. coli* expressed protein was done as previously described  
1041 (Budaitis et al., 2021) . For the JIP3 and DCX constructs, a two-step purification was  
1042 performed. For Sfp and kif5b, only the His-tag purification was performed. Briefly, the cell  
1043 pellet was thawed at 37°C, and then nutated at room temperature for 20 minutes. The lysate  
1044 was dounced for 10 strokes on ice and cleared via centrifugation at 80K rpm for 10 minutes  
1045 at 4°C using a TLA 110 rotor (Beckman) in a tabletop Beckman ultracentrifuge. At the  
1046 same time, 500 µL of the Ni-NTA slurry (Roche cComplete His-Tag purification resin) was  
1047 washed with 2x1 mL of wash buffer (WB, 50 mM HEPES, 300 mM KCl, 2 mM MgCl<sub>2</sub>, 1  
1048 mM EGTA, 1 mM DTT, 0.1 mM ATP, 1 mM PMSF, 0.1% (w/v) Pluronic F-127, pH 7.2)  
1049 in a 10-mL column (Bio-Rad #7311550). After the centrifugation, the supernatant was



1050 loaded into the column, and allowed to flow through the resin by gravity. The resin was  
1051 then washed with 3x2 mL of WB.

1052 For Halo-tag labeling, halo-tag ligand was added to final 10  $\mu$ M, and the resin was  
1053 incubated at room temperature for 10 minutes. For ybbR-tag labeling, the CoA-dye ligand  
1054 for ybbR-tag was generated by reacting Coenzyme A (CoA) with a dye containing a  
1055 maleimide group in 1:1 ratio at room temperature for 30 minutes. The final product was  
1056 quenched with 50 mM DTT, aliquoted, flash frozen, and stored at  $-80^{\circ}\text{C}$ . To label the  
1057 ybbR-tag, CoA-dye and Sfp was added to the resin to a final concentration of 10  $\mu$ M. The  
1058 resin was nutated at  $4^{\circ}\text{C}$  for 3 hours. After the labeling, the resin was washed with 3x3 mL  
1059 of WB, and eluted with Ni-NTA elution buffer (Ni-EB, 50 mM HEPES, 150 mM KCl, 2  
1060 mM  $\text{MgCl}_2$ , 1 mM EGTA, 1 mM DTT, 0.1 mM ATP, 1 mM PMSF, 0.1% (w/v) Pluronic  
1061 F-127, 250 mM imidazole, pH 7.2). For BirA and kif5b, the protein was aliquoted, flash  
1062 frozen, and stored at  $-80^{\circ}\text{C}$  until further usage. For JIP3 and DCX, the concentrated  
1063 fraction was pooled and flown through 1 mL of streptactin slurry (IBA #2-1201) which  
1064 had been washed with 2x1 mL WB. The resin was then washed with 3x2 mL WB, and then  
1065 eluted with streptactin elution buffer (St-EB, 50 mM HEPES, 150 mM KCl, 2 mM  $\text{MgCl}_2$ ,  
1066 1 mM EGTA, 1 mM DTT, 0.1 mM ATP, 1 mM PMSF, 0.1% (w/v) Pluronic F-127, 2.5  
1067 mM dethiobiotin, pH 7.2). The concentrated fraction was pooled and further concentrated  
1068 via centrifugation using Amicon 0.5-mL 10 kDa unit. The protein was verified on a PAGE  
1069 gel, and the concentration was determined using Bradford assay.

1070

1071 **Constructs for protein expression in insect cells**

1072           The pFastBac plasmid with codon-optimized full-length human dynein was a gift  
1073 from the Carter lab (MRC laboratory of Molecular Biology, Francis Crick Avenue,  
1074 Cambridge, UK) (Schlager et al, 2014). The pFastBac plasmid that encodes tail-truncated  
1075 human dynein (amino acids 1320-4646 of DYNC1H1) was a gift from the Reck-Peterson  
1076 Lab (Department of Cellular and Molecular Medicine, University of California, San Diego,  
1077 CA, US) (Htet et al, 2020).

1078

### 1079 **Protein expression in insect cells**

1080           Full-length human dynein and tail-truncated human dynein were expressed in Sf9  
1081 cells as described previously (Schlager et al, 2014; Htet et al, 2020). Briefly, the pFastBac  
1082 plasmid containing full-length human dynein or tail-truncated dynein was transformed into  
1083 DH10Bac competent cells (Gibco, #10361012) with heat shock at 42 °C for 45 seconds  
1084 followed by incubation at 37 °C for 4 hours in S.O.C. medium (Gibco, #15544034). The  
1085 cells were then plated onto LB agar plates containing kanamycin (50 µg mL<sup>-1</sup>), gentamicin  
1086 (7 µg mL<sup>-1</sup>), tetracycline (10 µg mL<sup>-1</sup>), BluoGal (100 µg mL<sup>-1</sup>) and isopropyl-β-D-  
1087 thiogalactoside (IPTG; 40 µg mL<sup>-1</sup>), and positive clones were identified by a blue/white  
1088 color screen after 36 hours. Bacmid DNA was extracted from overnight culture using an  
1089 isopropanol precipitation method with Qiagen buffer (Qiagen, #27104) as described  
1090 previously (Schlager et al, 2014). To generate baculovirus for Sf9 insect cell transfection,  
1091 2 mL of Sf9 cells at 0.5×10<sup>6</sup> cells per mL in six well plates (Corning, #3516) were  
1092 transfected with 2 µg of fresh bacmid DNA and 6 µL of FuGene HD transfection reagent  
1093 (Promega, E2311) according to the manufacture's instruction. The cells were incubated for  
1094 4 days and the supernatant containing V0 virus was collected then. To generate V1 virus,

1095 0.5 mL of V0 virus was used to transfect 50 mL of Sf9 cells at  $1.5 \times 10^6$  cells per mL. The  
1096 supernatant containing V1 virus was collected by centrifugation at 200 g for 5 minutes at  
1097 4 °C after 3 days. The V1 virus was stored at 4 °C in the dark until use. For protein  
1098 expression, 5 mL of the V1 virus was used to transfect 500 mL Sf9 cells at  $2 \times 10^6$  cells per  
1099 mL. After 60 hours incubation, cells were collected by centrifugation at 3000 g for 10  
1100 minutes at 4 °C. The cell pellet was resuspended in 15 mL ice-cold PBS and centrifuged  
1101 again. The supernatant was then removed, and the cell pellet was flash-frozen in liquid  
1102 nitrogen and stored at -80 °C.

1103

#### 1104 **Purification and labeling of tail-truncated and full-length human dynein**

1105 Full-length dynein and tail-truncated dynein was purified from frozen Sf9 pellets  
1106 as described previously (Schlager et al, 2014; Htet et al, 2020). Frozen pellets from 500  
1107 mL insect cell culture were thawed on ice and resuspended in lysis buffer (50 mM HEPES  
1108 pH 7.4, 100 mM NaCl, 1 mM DTT, 0.1 mM ATP, 10% (v/v) glycerol, 2 mM PMSF)  
1109 supplemented with 1 protease inhibitor cocktail tablet (cOmplete-EDTA free, Roche,  
1110 #11836170001) to a final volume of 50 mL. Cells were then lysed using a Dounce  
1111 homogenizer with 20 strokes. The lysate was cleared by centrifugation at 279,288 g for 10  
1112 minutes at 4 °C using a Beckman Coulter tabletop centrifuge unit. The clarified supernatant  
1113 was incubated with 3 mL of IgG Sepharose 6 Fast Flow beads (Cytiva, #17096901) for 4  
1114 hours with rotation. After incubation, the protein bound IgG beads were transferred to a  
1115 gravity flow column and washed with 100 mL lysis buffer and 100 mL TEV buffer (50 mM  
1116 Tris-HCl pH 8.0, 250 mM potassium acetate, 2 mM magnesium acetate, 1 mM EGTA,  
1117 1 mM DTT, 0.1 mM Mg-ATP and 10% (v/v) glycerol). To fluorescently label the carboxy-

1118 terminal SNAPf tag of full-length human dynein, dynein coated beads were incubated with  
1119 5  $\mu$ M SNAP-Cell TMR (New England BioLabs, #S9105S) in the column for 10 minutes at  
1120 room temperature. The beads were then washed with 100 mL TEV buffer at 4 °C to remove  
1121 unbound dyes. Subsequently, the beads were resuspended in TEV buffer (final volume 5  
1122 mL) with 100  $\mu$ L TEV protease (New England BioLabs, #P8112S) and incubated at 4°C  
1123 on a roller overnight. After TEV cleavage, the beads were removed and protein of interest  
1124 was concentrated using a 100 kDa molecular weight cut-off (MWCO) concentrator  
1125 (Millipore, #Z648043) to 1 mL and flash-frozen in liquid nitrogen.

1126

### 1127 **Microtubule polymerization**

1128 Microtubule polymerization was performed as described before (Rao et al., 2018).  
1129 Briefly, 2  $\mu$ L of 10 mg/mL unlabeled tubulin (Cytoskeleton) was mixed with 2  $\mu$ L of 1  
1130 mg/mL biotin-tubulin and 2  $\mu$ L of 1 mg/mL dye-labeled tubulin on ice. 0.5  $\mu$ L of 10 mM  
1131 GTP was added to the mixture, and the mixture was incubated at 37°C for 20 minutes.  
1132 Afterwards 0.7  $\mu$ L of 0.2 mM taxol (in DMSO) was added, and the solution was incubated  
1133 at 37°C for another 15 minutes. The un-incorporated tubulin was removed by centrifuging  
1134 through a glycerol cushion (80 mM PIPES, 2 mM MgCl<sub>2</sub>, 1 mM EGTA, 60% glycerol, 10  
1135  $\mu$ M taxol, 1 mM DTT, pH 6.8) at 80k rpm for 5 minutes at room temperature using TLA  
1136 motor in a tabletop Beckman ultracentrifuge. The supernatant was discarded, and the pellet  
1137 was resuspended in 12  $\mu$ L resuspension buffer (80 mM PIPES, 2 mM MgCl<sub>2</sub>, 1 mM EGTA,  
1138 10% glycerol, 10  $\mu$ M taxol, 1 mM DTT, pH 6.8) to obtain a final 2 mg/mL MT  
1139 concentration for the TIRF assay. For the MT-binding and -release assay, 5  $\mu$ L of 10  
1140 mg/mL unlabeled tubulin was used to polymerize the MTs, and the pellet was resuspended  
1141 in 10  $\mu$ L of the resuspension buffer to obtain a final 5 mg/mL MT concentration.

1142

1143 **Microtubule-binding and -release assay of kif5b and single-head human**  
1144 **dynein**

1145 Impaired/inactive motors were removed by a MT-binding and -release assay as  
1146 described before (Budaitis et al., 2021; Rao et al., 2019). Briefly, 50  $\mu$ L of protein solution  
1147 was exchanged into a binding buffer (30 mM HEPES, 50 mM KCl, 2 mM MgCl<sub>2</sub>, 1 mM  
1148 EGTA, 10% glycerol, 1 mM DTT, 0.1 mM AMP-PnP, pH 7.2) using Zeba 7-kDa unit  
1149 (ThermoScientific #89882). The protein solution was warmed to room temperature, and  
1150 taxol was added to final 20  $\mu$ M concentration. For kif5b, AMP-PnP was also added to a  
1151 final 1 mM concentration. 3  $\mu$ L of the 5 mg/mL MT stock was added to the protein solution  
1152 and then mixed well. The solution was then carefully layered on top of 100  $\mu$ L of glycerol  
1153 cushion for kif5b (80 mM PIPES, 2 mM MgCl<sub>2</sub>, 1 mM EGTA, 60% glycerol, 10  $\mu$ M taxol,  
1154 1 mM DTT, pH 6.8) or sucrose cushion for dynein (30 mM HEPES, 50 mM KCl, 2 mM  
1155 MgCl<sub>2</sub>, 10% glycerol, 25% w/v sucrose, 10  $\mu$ M taxol, 1 mM DTT, pH 7.2) in a TLA 100  
1156 rotor (Beckman), and centrifuged at 45krpm for kif5b or 80krpm for dynein at room  
1157 temperature for 10 minutes. Afterwards, the supernatant was removed and the pellet was  
1158 washed with 2x20  $\mu$ L wash buffer (30 mM HEPES, 50 mM KCl, 2 mM MgCl<sub>2</sub>, 10%  
1159 glycerol, 10  $\mu$ M taxol, 1 mM DTT, pH 7.2). The pellet was then resuspended in 47  $\mu$ L of  
1160 high-salt release buffer (HSRB, 30 mM HEPES, 300 mM KCl, 2 mM MgCl<sub>2</sub>, 10% glycerol,  
1161 10  $\mu$ M taxol, 1 mM DTT, pH 7.2), and 3  $\mu$ L of 100 mM ATP was added to the solution.  
1162 The solution was centrifuged at 40k rpm for 5 minutes, and the supernatant was aliquoted,  
1163 flash frozen, and stored at  $-80^{\circ}$ C for further usage.

1164

1165 **DDJ complex assembly**

1166 DDJ complex was assembled following a published protocol (Potokar et al.).  
1167 Briefly, dynein, dynactin (a gift from the laboratory of Andrew Carter, MRC), and JIP3  
1168 were mixed on ice in 1:1:1 ratio (final concentration of 200 nM each) and incubated for 1  
1169 hour on ice in the dark. For DDJ complex formation in the presence of N-DCX, N-DCX  
1170 was added in equal amount as dynein.

1171

1172 **TIRF motility assay**

1173 The TIRF motility assay was performed as described before (Budaitis et al., 2021).  
1174 Briefly, a coverslip was cleaned using ethanol, and assembled into a flow chamber. 10  $\mu$ L  
1175 of 0.5 mg/mL biotin-BSA was introduced into the flow chamber, and the flow chamber  
1176 was incubated at room temperature for 10 minutes in a humidity chamber. The chamber  
1177 was then washed with 3 $\times$ 20  $\mu$ L of blocking buffer (BB, 80 mM PIPES, 2 mM MgCl<sub>2</sub>, 1  
1178 mM EGTA, 10  $\mu$ M taxol, 1% (w/v) Pluronic F-127, 2 mg/ml BSA, 1 mg/mL  $\alpha$ -casein, pH  
1179 6.8), and incubated for 10 minutes. The solution in the chamber was completely removed  
1180 using vacuum, and 10  $\mu$ L of 0.25 mg/mL streptavidin was flown in and incubated at room  
1181 temperature for 10 minutes. The chamber was then wash with 3 $\times$ 20  $\mu$ L of BB, and the  
1182 solution was completely removed afterward. 0.5  $\mu$ L of 0.2 mg/mL fluorescently labeled  
1183 MTs was diluted in 19.5  $\mu$ L of BB and flown into the chamber. The chamber was then  
1184 washed with 2 $\times$ 20  $\mu$ L BB and 20  $\mu$ L of motility buffer (MB, 60 mM HEPES, 50 mM KAc,  
1185 2 mM MgCl<sub>2</sub>, 1 mM EGTA, 0.5% (w/v) Pluronic F-127, 10  $\mu$ M taxol, 1 mM DTT, 5  
1186 mg/mL BSA, 1 mg/mL  $\alpha$ -casein, pH 7.2). 1  $\mu$ L of 100 mM ATP, 1  $\mu$ L of 50 mM biotin,  
1187 and 1  $\mu$ L of oxygen scavenger system was added to 46  $\mu$ L of MB, and 1  $\mu$ L of 10 nM DDJ

1188 complex was added subsequently. For DCX and N-DCX experiments, DCX was added to  
1189 a final 10 nM in the final solution. The solution was mixed well and flown into the chamber.  
1190 The chamber was then sealed with vacuum grease. The acquisition time was 200 ms per  
1191 frame, and a total of 600 frames was taken for each movie. The data was analyzed using a  
1192 custom-built MATLAB software, and the statistical analysis and data visualization were  
1193 performed using Prism.

1194

### 1195 **TIRF gliding assay**

1196 A slide chamber was assembled as described above. 10  $\mu$ L of 0.1 mg/mL anti-GFP  
1197 antibody (YenZym) was introduced into the chamber, which was then incubated in a  
1198 humidity chamber for 10 minutes. The chamber was washed with 3 $\times$ 20  $\mu$ L BB and 20  $\mu$ L  
1199 of MB. 1  $\mu$ L of MTBR fraction of single-head human dynein was diluted in 19  $\mu$ L of MB,  
1200 and the solution was flown into the chamber and incubated for 2 minutes. The chamber  
1201 was washed with 3 $\times$ 20  $\mu$ L of MB to remove unbound dynein. 1  $\mu$ L of 100 mM ATP, 0.5  
1202  $\mu$ L of 0.2 mg/mL MTs, and 1  $\mu$ L of oxygen scavenger system was added to 47.5  $\mu$ L of  
1203 MB, which was flown into the chamber. The chamber was sealed with vacuum grease. The  
1204 imaging condition and analysis was done as described above.

1205

### 1206 **Statistical Analysis**

1207 Statistical analyses were performed using GraphPad Prism 7.0 software (GraphPad  
1208 Software Inc., San Diego, CA, USA). All data are presented as the mean  $\pm$  SEM of at least  
1209 three independent experiments. Statistical significance was determined using one-way  
1210 analysis of variance (ANOVA) followed by Tukey's test if more than two groups were



1211 analyzed. Two-tailed test and student's t-test was used to compare two groups.  $P < 0.05$

1212 was considered significant (\*  $p < 0.05$ ; #  $p < 0.01$ , if not specified otherwise).

1213

1214 **Supplemental video1.** Live-cell imaging shows DIC mobility in a WT neuron.

1215 **Supplemental video2.** Live-cell imaging shows DIC mobility in a Dcx-/y neuron.

1216 **Supplemental video3.** Live-cell imaging shows TrkB mobility in a WT neuron.

1217 **Supplemental video4.** Live-cell imaging shows TrkB mobility in a Dcx-/y neuron.

1218 **Supplemental video5.** Live-cell imaging shows TrkB mobility in a Dcx-/y neuron

1219 transfected with JIP3-shRNA.

1220 **Supplemental video6.** Live-cell imaging shows TrkB mobility in a WT neuron

1221 transfected with JIP3.

1222 **Supplemental video7.** JIP3 has a transient affinity for dynein.

1223

1224 Table 1: Pull down assay results show cytoskeleton proteins associated with DCX.  
1225

| Protein IDs | Protein names                                            | Q-value | Score | Average normalized intensity |           |
|-------------|----------------------------------------------------------|---------|-------|------------------------------|-----------|
|             |                                                          |         |       | Control (HA)                 | HA-DCX    |
| Q61301      | Catenin alpha-2                                          | 0       | 83    | 0                            | 158960000 |
| P57780      | Alpha-actinin-4                                          | 0       | 76    | 0                            | 246655000 |
| Q8BMK4      | Cytoskeleton-associated protein 4                        | 0       | 70    | 0                            | 124115000 |
| Q02248      | Catenin beta-1                                           | 0       | 55    | 0                            | 133995000 |
| P05213      | Tubulin alpha-1B chain;Tubulin alpha-4A chain            | 0       | 52    | 0                            | 600270000 |
| Q9D6F9      | Tubulin beta-4A chain                                    | 0       | 38    | 0                            | 91708000  |
| Q8BTM8      | Filamin-A                                                | 0       | 38    | 0                            | 48710000  |
| Q8K341      | Alpha-tubulin N-acetyltransferase 1                      | 0       | 36    | 0                            | 9883000   |
| Q99KJ8      | Dynactin subunit 2                                       | 0       | 32    | 0                            | 67364000  |
| Q3TPJ8      | Cytoplasmic dynein 1 intermediate chain 2                | 0       | 25    | 0                            | 34566000  |
| Q9CPW4      | Actin-related protein 2/3 complex subunit 5              | 0       | 21    | 0                            | 32742000  |
| Q9D898      | Actin-related protein 2/3 complex subunit 5-like protein | 0       | 17    | 0                            | 3859300   |
| Q6R891      | Neurabin-2                                               | 0       | 15    | 0                            | 6523000   |
| P28667      | MARCKS-related protein                                   | 0       | 14    | 0                            | 52599500  |
| Q9JM76      | Actin-related protein 2/3 complex subunit 3              | 0       | 14    | 0                            | 30507500  |
| Q7TPR4      | Alpha-actinin-1                                          | 0       | 12    | 0                            | 6880500   |
| P60710      | Actin, cytoplasmic 1, N-terminally processed             | 0       | 9     | 0                            | 30897500  |
| Q3UX10      | Tubulin alpha chain-like 3                               | 0       | 8     | 0                            | 7851000   |
| Q9CQV6      | Microtubule-associated proteins 1A/1B light chain 3B     | 0       | 7.5   | 0                            | 42111500  |
| Q922F4      | Tubulin beta-6 chain                                     | 0.001   | 7.3   | 0                            | 12908500  |
| Q9QZB9      | Dynactin subunit 5                                       | 0.007   | 6.2   | 0                            | 2061750   |

1226  
1227

1228

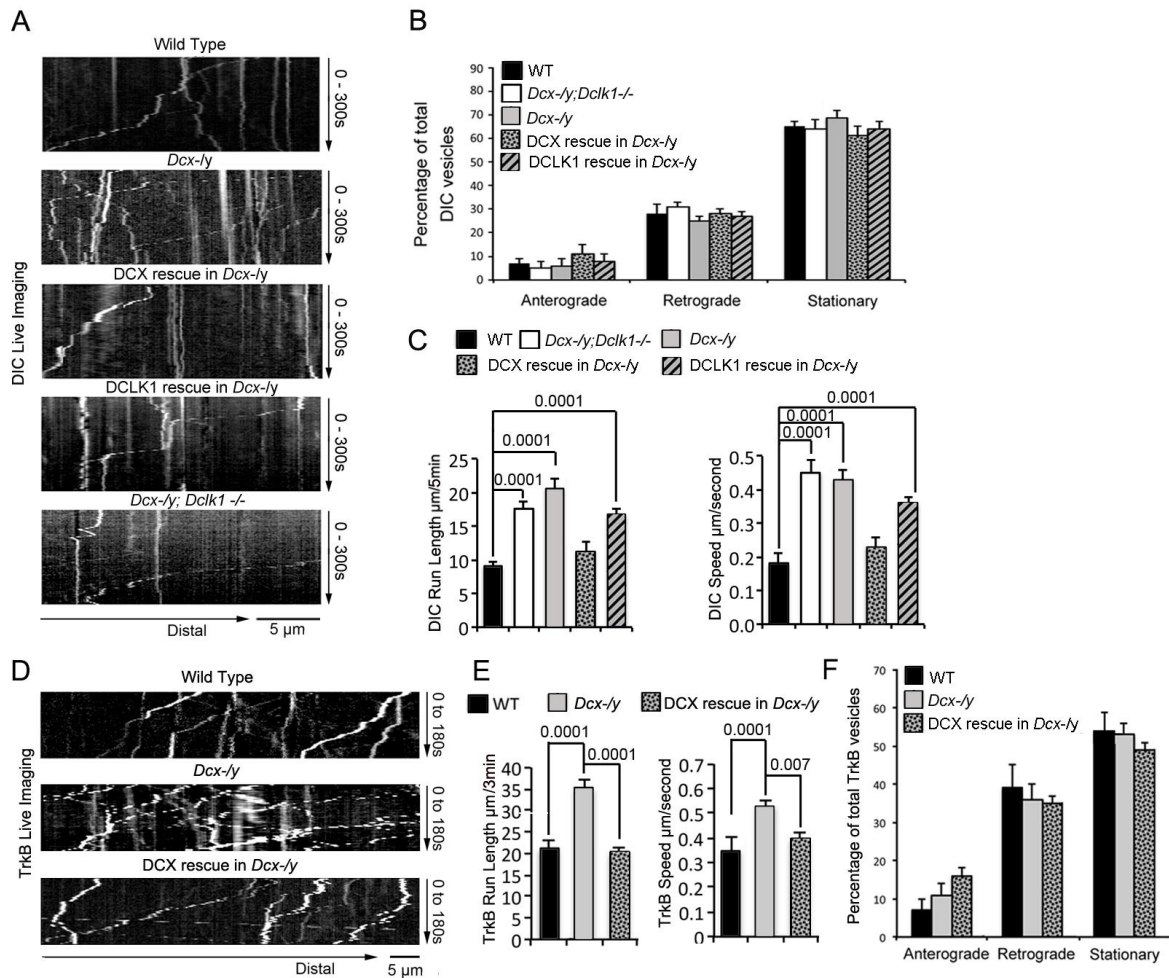

1229

1230

1231

1232

1233

1234

1235

1236

1237

1238

1239

1240

1241

1242

1243

1244

1245

1246

1247

1248

1249

**Figure 1. The retrograde trafficking of the dynein motor and TrkB transport is increased in axons without DCX.** (A) WT, *Dcx-/-* or *Dcx-/-;Dclk1-/-* associated cortical neuronal culture were transfected with plasmids expressing DIC-RFP on DIV6 and imaged on DIV8. For rescue experiments, *Dcx-/-* neurons were transfected with plasmids expressing DIC-RFP combined with plasmids expressing either DCX-GFP or DCLK1-GFP. Representative kymographs of DIC-RFP transport in axons are shown. (B) Distribution calculations of the DIC vesicle mobility status (anterograde, retrograde and stationary) are demonstrated. No significant differences are observed among different neurons. (C) Quantifications of DIC-RFP run length within 300 seconds and velocity are shown. DCX, but not DCLK1, fully rescued the increased dynein motor transport observed in DCX deficient axons. P values comparing WT and DCX rescue for run length and speed are 0.57 and 0.18, respectively. Other P values are shown in the figure. (D) Dissociated cortical neuronal cultures from WT or *Dcx-/-* mice were transfected with plasmids expressing TrkB-RFP with/without plasmids expressing DCX-GFP on DIV6 and imaged on DIV8. Representative kymographs of TrkB-RFP transport in axons are shown. (E) Quantification of vesicle Run length within 180 seconds and velocity are demonstrated. DCX rescued the increased TrkB-RFP transport in DCX deficient axons. (F) Distribution calculations of the TrkB vesicle mobility status (anterograde, retrograde and stationary) are demonstrated. No significant differences are observed among different neurons. Data are based on three independent experiments of each condition. P-values from t-tests are shown in each panel. Total numbers of neurons (N) and vesicles (V) used in the calculations are indicated in Suppl. Fig. 1. See also Suppl. Videos 1-4.

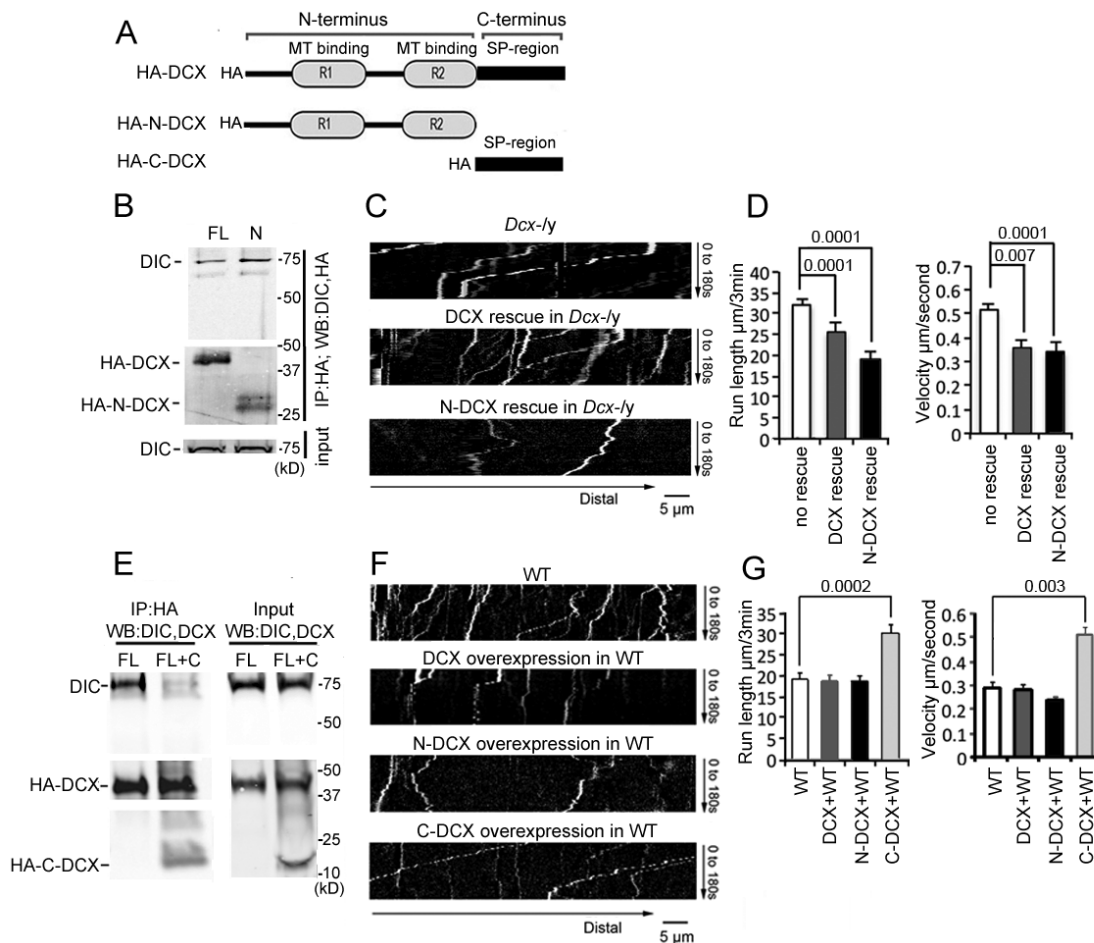

1250  
1251  
1252  
1253  
1254  
1255  
1256  
1257  
1258  
1259  
1260  
1261  
1262  
1263  
1264  
1265  
1266  
1267  
1268  
1269  
1270  
1271  
1272

**Figure 2. DCX affects the retrograde transport through DCX/dynein interaction.**

(A) A schematic of DCX protein domain structure. N-DCX has N terminal R1 and R2 domains represent MT-binding domains of DCX, while C-DCX has DCX C terminal Serine/Proline (SP) rich domain. (B) More N-DCX proteins are pulled down with DIC compared to full length DCX. HEK cells were transfected with plasmids expressing HA tagged either full length DCX (FL) or N-DCX (N) for two days. Protein lysates were used for immunoprecipitation using antibodies for HA and analyzed by Western blot for DIC and HA. (C) Dissociated cortical neuronal culture from *Dcx-ly*; *Dcl1*<sup>-/-</sup> mice were transfected with plasmids expressing TrkB-RFP with/without plasmids expressing DCX or N-DCX on DIV6 and imaged on DIV8. Representative kymographs of TrkB-RFP transports in axons are shown. (D) The expression of either full length DCX or N-DCX in DCX knockout neurons significantly decreased TrkB retrograde transport while N-DCX has stronger effect compared to full length DCX. (E) C-DCX decreases DCX/DIC association. HEK cells were transfected with plasmids expressing HA tagged full length DCX (FL) with/without plasmid expressing C-DCX for two days. Protein lysates were used for immunoprecipitation using antibodies for HA and analyzed by Western blot for DIC and HA. (E) Dissociated cortical neuronal culture from wild type mice were transfected with plasmids expressing TrkB-RFP with/without plasmids expressing DCX, N-DCX or C-DCX on DIV6 and imaged on DIV8. Representative kymographs of TrkB-RFP transports in axons are shown. (F) Run length within 180 seconds and velocity distributions of retrograde TrkB complexes in axons are quantified. C-DCX overexpression in wild type neurons mimicked the phenotype of TrkB retrograde trafficking observed in *Dcx-ly* axons. All quantification data is based on three independent experiments of each condition. P-values from t-tests are shown in each panel. Total numbers of neurons (N) and vesicles (V) used in the calculations are indicated in Suppl. Fig. 3. See also Suppl. Fig. 2.

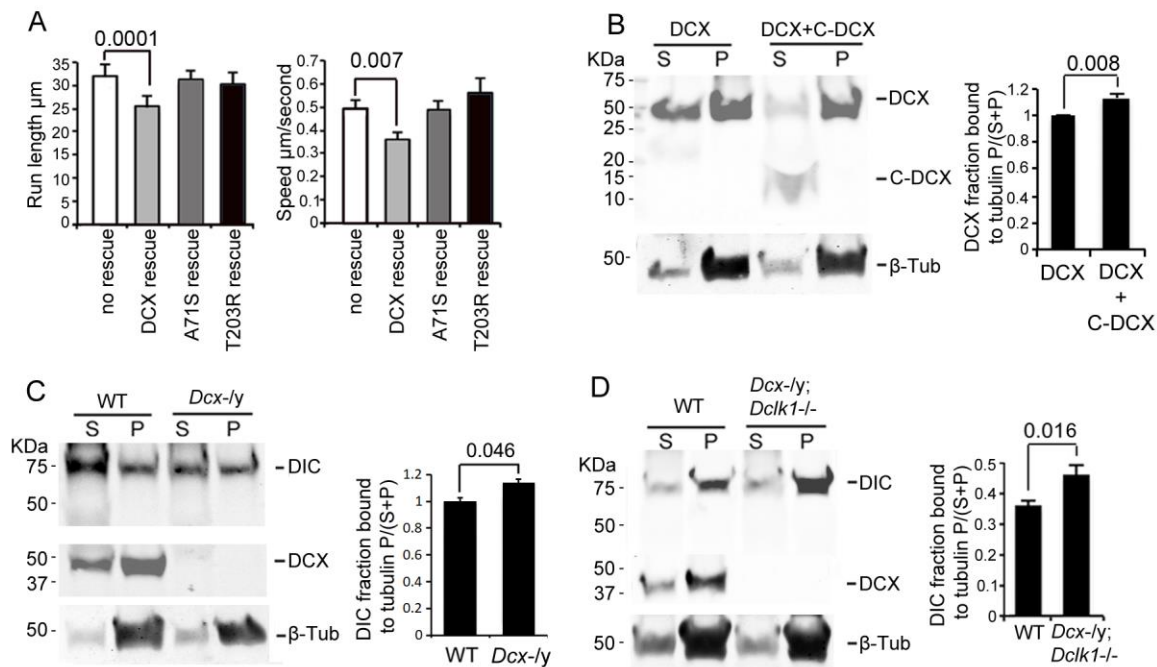

1273  
 1274 **Figure 3. DCX association with MTs.** (A). Dissociated cortical neuronal cultures from WT or *Dcx-ly*  
 1275 mice were transfected with plasmids expressing TrkB-RFP with/without plasmids expressing DCX-GFP,  
 1276 DCXA71S, or DCXT203R on DIV6 and imaged on DIV8. Quantification of Run length within 180  
 1277 seconds and velocity are demonstrated. DCX, but not DCXA71S or DCXT203R, rescued the increased  
 1278 TrkB-RFP transport in DCX deficient axons. All quantifications are based on three independent  
 1279 experiments of each condition. P-values from t-tests are shown in each panel. Total numbers of neurons  
 1280 (N) and vesicles (V) used in the calculations are indicated in Suppl. Fig. 4. (B). Protein lysate from Hek293  
 1281 cells expressing HA-DCX or HA-DCX plus HA-C-DCX are incubated with exogenously added MTs,  
 1282 which are then pelleted by ultracentrifugation. Western blot for HA in supernatant (S) or pellet (P) is  
 1283 performed to determine the amount of DCX or C-DCX associated with MTs. Representative Western  
 1284 blots are shown. Fraction of DCX bound to tubulin is calculated (Tubulin bound=P/(S+P)) and compared.  
 1285 Significantly more DCX is bound to MTs in the presence of C-DCX. P-value from t-test is shown. (C-D)  
 1286 Brain lysate from P0 WT, *Dcx-ly* or *Dcx-ly;Dclk1-/-* mice are incubated with exogenously added MTs,  
 1287 which are then pelleted by ultracentrifugation. Polymerized MTs are in the pellet. Western blot of DIC in  
 1288 supernatant (S) or pellet (P) is performed to determine the amount of DIC associated with MTs.  
 1289 Representative Western blots are shown. Fraction of DIC bound to tubulin is calculated (Tubulin  
 1290 bound=P/(S+P)) and compared between WT and *Dcx-ly*; or WT and *Dcx-ly;Dclk1-/-*. Significantly more  
 1291 DIC is bound to MTs in the absence of DCX. P-value from t-test is shown.  
 1292



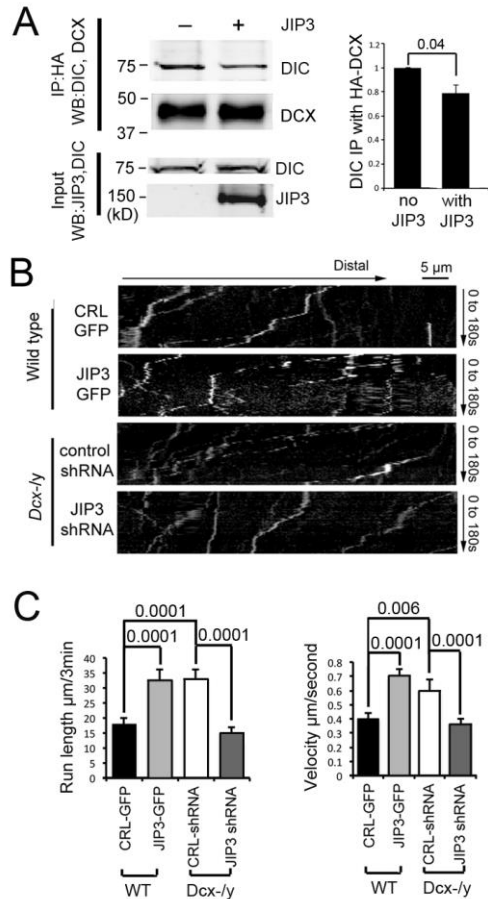

1293

1294 **Figure 4. DCX and JIP3 competitively bind to the dynein motor complex, and JIP3 enhances**  
 1295 **retrograde transport mediated by dynein.**

1296 (A) The presence of JIP3 decreases the interaction between DCX and DIC. HEK cells were transfected with  
 1297 plasmids expressing neuron-specific dynein intermediate chain isoform IC-1B and HA-tagged DCX with  
 1298 or without JIP3. Antibody for HA was used to precipitate HA-DCX and associated proteins. Western blot  
 1299 analysis of DIC and HA was performed to detect DIC immunoprecipitated with DCX. In the presence of  
 1300 JIP3, less DIC was associated with DCX, while total protein amount of either HA-DCX or DIC in the lysate  
 1301 were the same. Quantification of DIC bands of Western blot results (three independent experiments) after  
 1302 IP with HA were calculated and normalized with DIC levels in the lysate. P-value from t-test is shown. (B)  
 1303 Cultured cortical neurons from P0 WT mouse brains were transfected with plasmids expressing TrkB-RFP  
 1304 with or without JIP3-GFP. Neurons from Dcx-/- mouse brains were transfected with plasmids expressing  
 1305 TrkB-RFP with or without JIP3 shRNA. Representative kymographs of TrkB-RFP trafficking are  
 1306 demonstrated. (C) Quantification of TrkB run length and velocity. Overexpression of JIP3 significantly  
 1307 increases run length and velocity of TrkB in WT neurons. Downregulation of JIP3 by shRNA in Dcx-/-  
 1308 neurons decreases TrkB retrograde transport. P-values from t-tests are shown. All quantification data is  
 1309 based on three independent experiments of each condition. P-values from t-tests are shown in each panel.  
 1310 Total numbers of neurons (N) and vesicles (V) used in the calculations are indicated in Suppl. Fig. 5. See  
 1311 also Suppl. Video 5 and 6.  
 1312

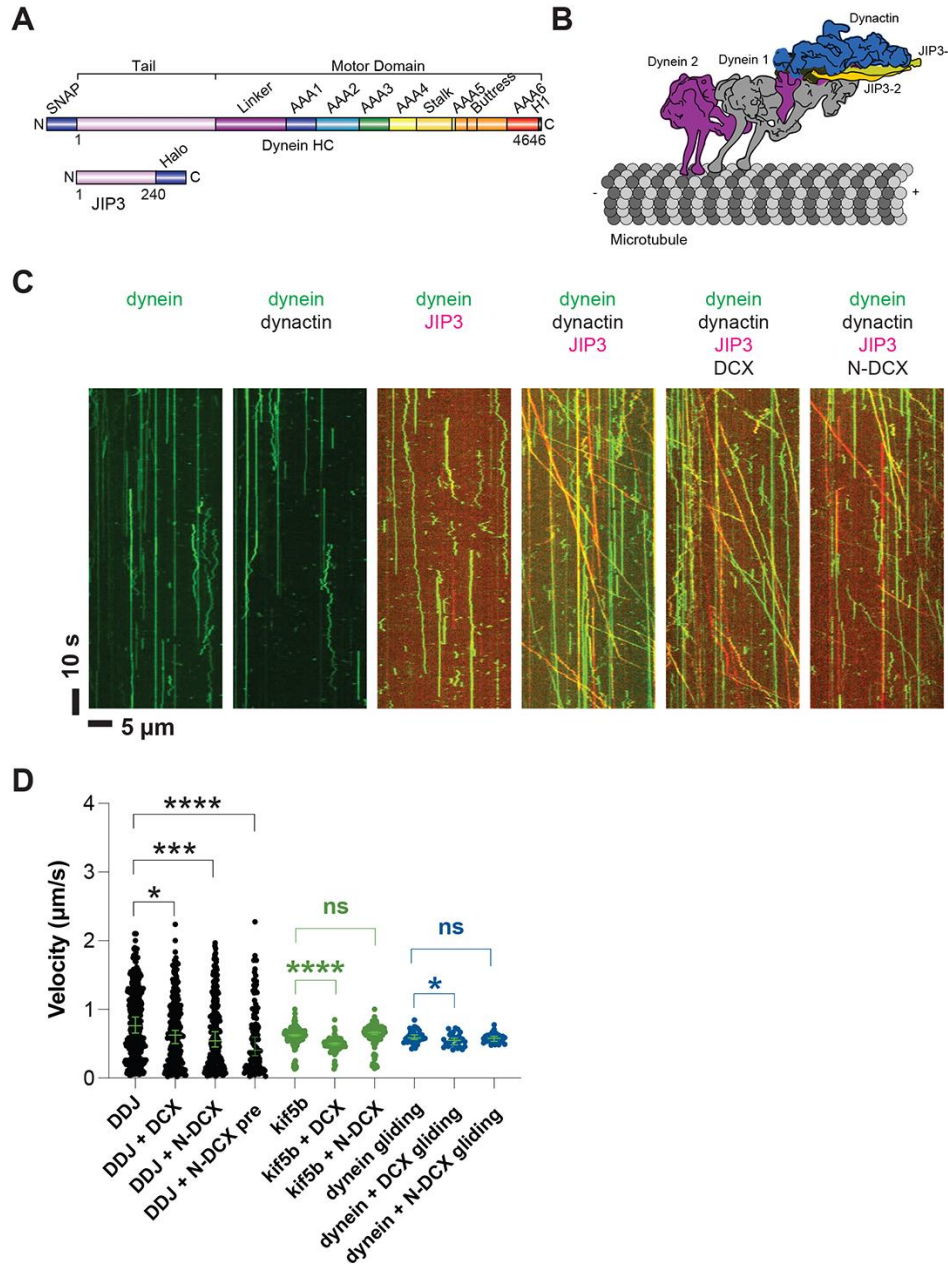

1313

1314 **Figure 5. Dynein and dynactin form an active motor complex with JIP3 in vitro and DCX reduces its**

1315 **velocity.** (A) Illustrations of the JIP3 and DCX constructs (left) and the DDJ motor complex (right). (B)

1316 Kymographs of dynein in the absence and presence of dynactin, JIP3, DCX and N-DCX. Dynein was

1317 labeled with SNAP-TMR (green) and JIP3 was labeled with Halo-JP646 (red). (C) The velocity of DDJ

1318 motor complexes, KIF5B, and gliding MTs powered by surface-absorbed single-headed dynein. The green

1319 bars represent the median with 95% CI. DDJ (DDJ only): 0.76 [0.65, 0.89] μm/s; DDJ + DCX (DDJ with

1320 10 nM DCX): 0.62 [0.50, 0.70] μm/s (KS test, \*p<0.1); DDJ + N-DCX (DDJ with 10 nM N-DCX): 0.54

1321 [0.45, 0.67] μm/s (KS test, \*\*\*p<0.001); DDJ + N-DCX pre (dynein, dynactin, JIP3, and N-DCX

1322 assembled in the ratio of 1:1:1:1): 0.41 [0.32, 0.60] μm/s (KS test, \*\*\*\*p<0.0001). kif5b (kif5b only): 0.63

1323 [0.61, 0.63] μm/s; kif5b + DCX (kif5b with 10 nM DCX): 0.50 [0.48, 0.51] μm/s (unpaired t-test,

1324 \*\*\*\*p<0.0001); kif5b + N-DCX (kif5b with 10 nM N-DCX): 0.66 [0.64, 0.67] μm/s (unpaired t-test, n.s.).

1325 MT gliding (powered by single-headed human dynein): 0.59 [0.56, 0.63] μm/s; dynein + DCX (MT gliding

1326 with 10 nM DCX): 0.55 [0.48, 0.58] μm/s (unpaired t-test, \*p<0.1); dynein + N-DCX (MT gliding with 10



1327 nM N-DCX): 0.58 [0.53, 0.61]  $\mu\text{m/s}$  (unpaired t-test, n.s.). From left to right, n = 342, 275, 252, 115, 234,  
1328 103, 117, 33, 31, 28. See also Suppl. Fig. 6-9, and Supple. Video 7.  
1329

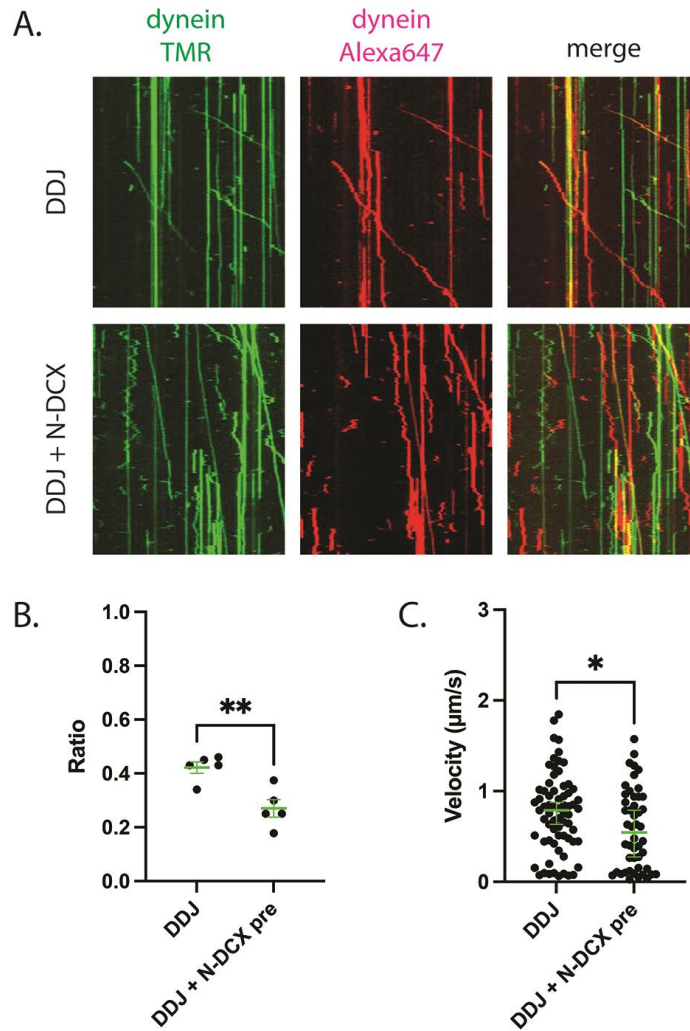

1330

1331 **Figure 6. DDJ motor complexes associate with two dyneins and N-DCX negatively affects its velocity**  
1332 **by displacing the second dynein.** (A) Kymograph of DDJ assembled in the absence (top) or presence  
1333 (bottom) of N-DCX with dynein that were labeled separately with SNAP-TMR and SNAP-Alexa647. (B)  
1334 The ratio of two-color moving molecules versus the total moving molecules. The green bars represent mean  
1335  $\pm$  SEM. DDJ:  $42 \pm 2\%$ ; DDJ + N-DCX pre:  $27 \pm 3\%$  (unpaired t-test,  $**p < 0.01$ ). The molecules within  
1336 each field of view were counted to produce a single value ( $50 \mu\text{m} \times 50 \mu\text{m}$ ). (C) The velocity of two-color  
1337 moving molecules. The green bars represent median with 95% CI. DDJ:  $0.79 [0.63, 0.87] \mu\text{m/s}$ ; DDJ + N-  
1338 DCX pre:  $0.54 [0.27, 0.79] \mu\text{m/s}$  (KS-test,  $*p < 0.1$ ).  
1339

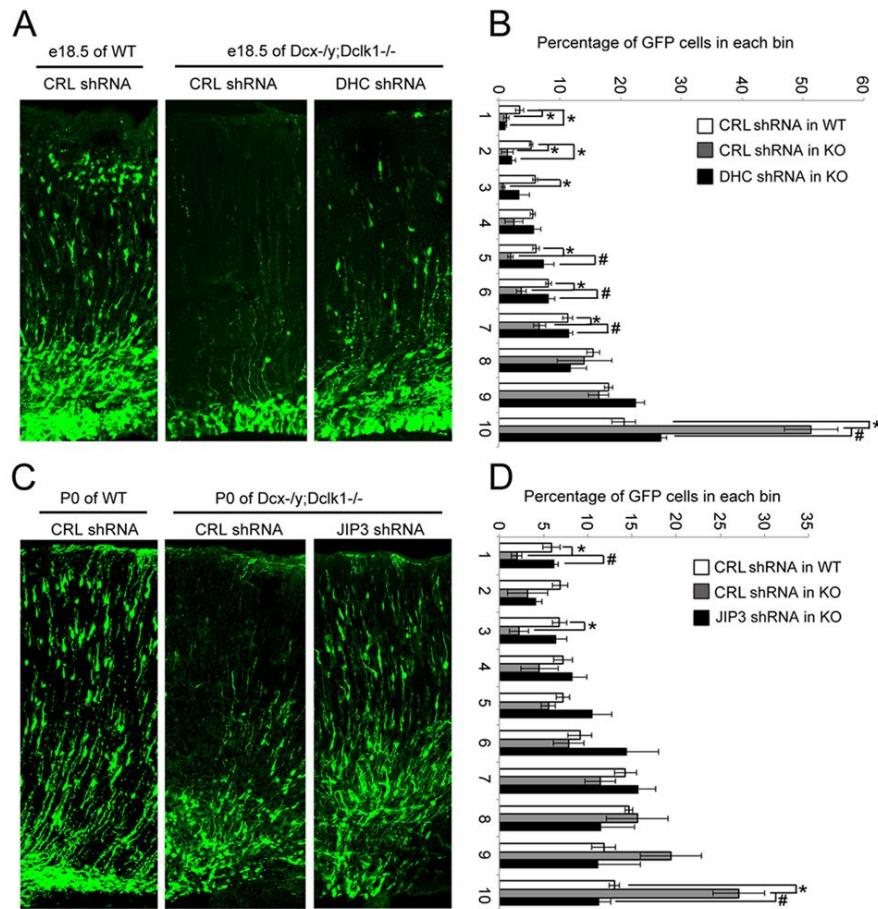

1340

1341 **Figure 7. Knock-down of DHC or JIP3 in *Dcx*<sup>-/y</sup>; *Dcl1*<sup>-/-</sup> in mouse cortex partially rescues the defect**  
 1342 **of pyramidal cell migration.** (A) GFP-positive neurons were imaged and counted at E18.5 after  
 1343 electroporation at E14.5 with vectors expressing control (CRL) shRNA (+GFP) or DHC shRNA (+GFP).  
 1344 (B) Percent of GFP positive cells in evenly divided regions of the cortex (1-10) from the pia to the lateral  
 1345 ventricle. Asterisks denote statistically significant p-values (t-test,  $p < 0.05$ ) between WT with CRL shRNA  
 1346 and *Dcx*<sup>-/y</sup>; *Dcl1*<sup>-/-</sup> with CRL shRNA. Number sign (#) denotes  $p < 0.05$  of t-test between *Dcx*<sup>-/y</sup>; *Dcl1*<sup>-/-</sup>  
 1347 with CRL shRNA and *Dcx*<sup>-/y</sup>; *Dcl1*<sup>-/-</sup> with DHC shRNA. The data represent the mean  $\pm$  SEM of three  
 1348 different brains in each condition. (C) GFP-positive neurons were imaged and counted at P0 after  
 1349 electroporation at E14.5 with vectors expressing control (CRL) shRNA (+GFP) or JIP3 shRNA (+GFP).  
 1350 (D) Percent of GFP positive cells in evenly divided regions of the cortex (1-10) from the pia to the lateral  
 1351 ventricle of different mouse brains. Asterisk (\*) denotes  $p < 0.05$  of t-test between WT with CRL shRNA and  
 1352 *Dcx*<sup>-/y</sup>; *Dcl1*<sup>-/-</sup> with CRL shRNA. Number sign (#) denotes  $p < 0.05$  of t-test between *Dcx*<sup>-/y</sup>; *Dcl1*<sup>-/-</sup>  
 1353 with CRL shRNA and *Dcx*<sup>-/y</sup>; *Dcl1*<sup>-/-</sup> with JIP3 shRNA. The data represent the mean  $\pm$  SEM of three  
 1354 individual brains in each condition.  
 1355

1356

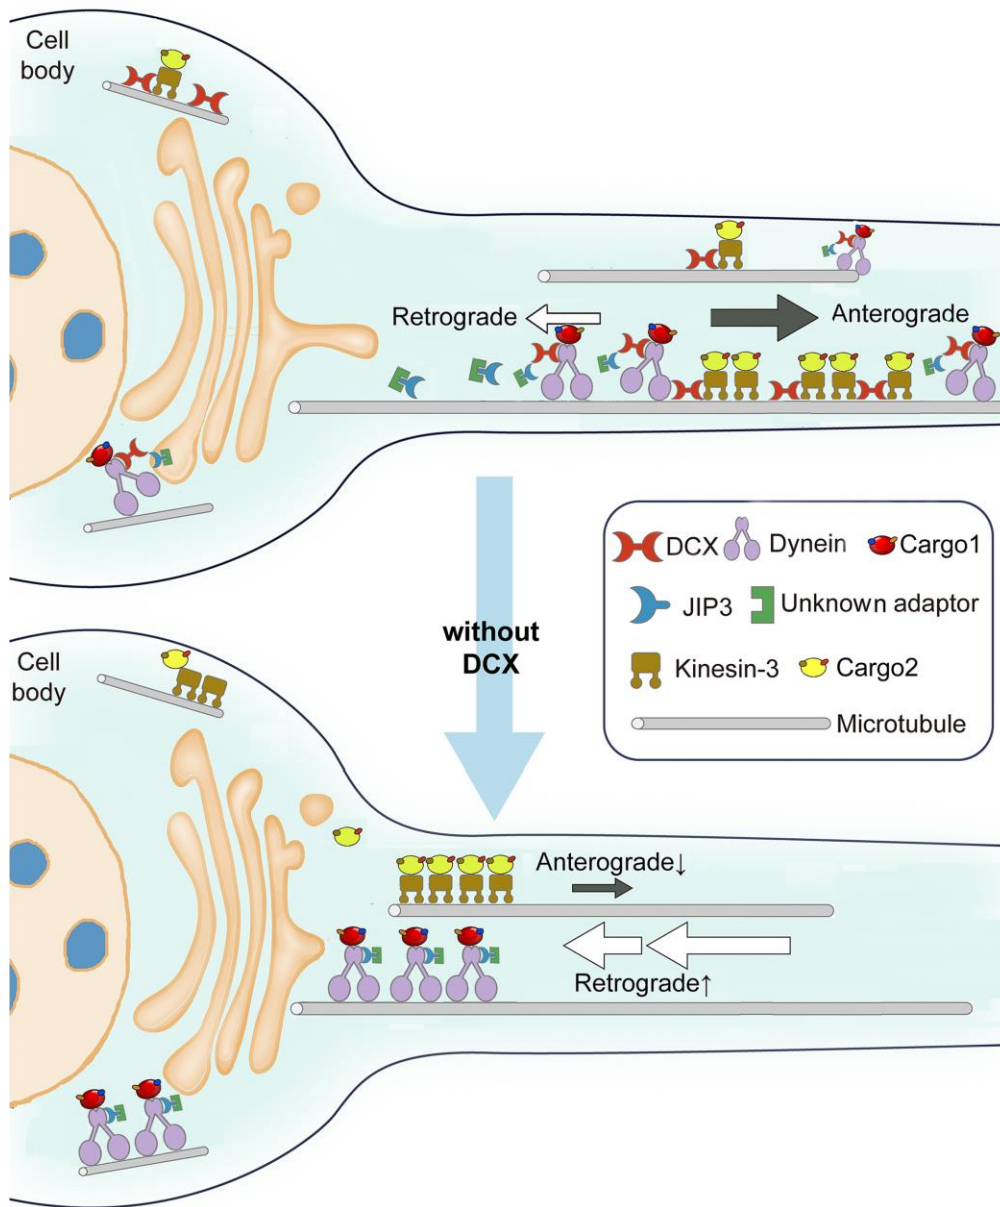

1357

1358 **Figure 8. Schematic diagram shows the regulation of dynein-mediated retrograde transport by**  
1359 **DCX.** Cargo-bound dynein motor complex drives retrograde transport from plus end of MTs (distal axon)  
1360 to minus end of MTs (cell body). In WT neurons, DCX association with kinesin-3 helps kinesin-3-  
1361 mediated anterograde transports (Liu et al., 2012). DCX decreases dynein-MT interactions (represented  
1362 by tilted dynein complex along MT). DCX and JIP3 competitively associate with dynein. When DCX  
1363 binds dynein, very few JIP3 proteins associate with dynein, the retrograde transport is normal. In DCX  
1364 KO neurons (without DCX), Kinesin-3-mediated anterograde transports are decreased without DCX (Liu  
1365 et al., 2012). Meanwhile, more JIP3 molecules bind dynein, which also associates with MT stronger  
1366 without DCX. The dynein mediated retrograde transport is faster. The balance between anterograde  
1367 transport and retrograde transport is broken without DCX.  
1368

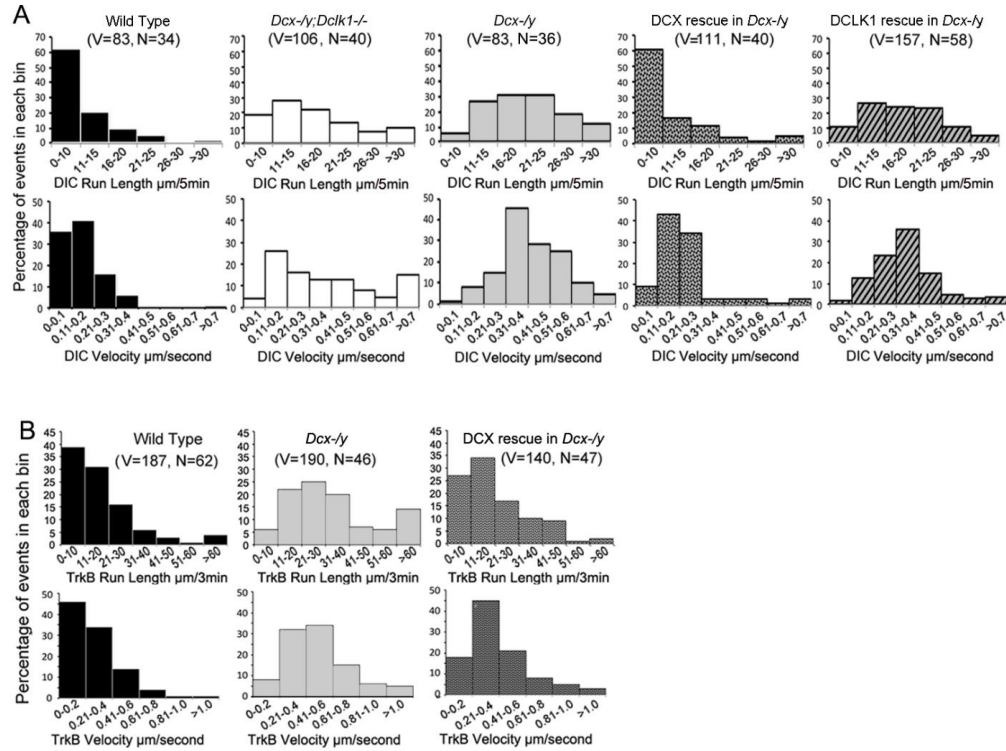

1369

1370

1371 **Supplemental Figure 1. Run length and velocity distributions of DIC and TrkB in different neurons.**

1372 (A) Run length and velocity distributions of retrograde DIC complexes in different neurons are shown.

1373 Total numbers of neurons (N) and vesicles (V) used in the calculations are indicated in the panel. (B) Run

1374 length and velocity distributions of retrograde TrkB complexes in different neurons are shown. Total

1375 numbers of neurons (N) and vesicles (V) used in the calculations are indicated in the panel.

1376



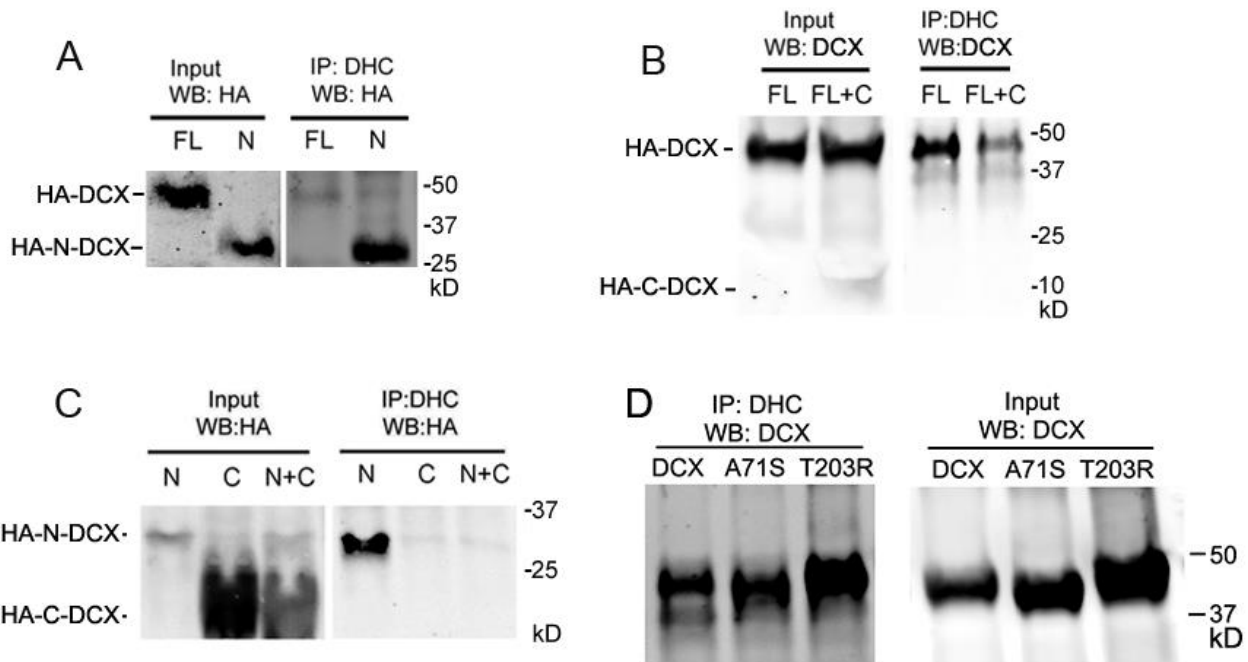

1378

1379 **Supplemental Figure 2. DCX associates with dynein heavy chain through its N-terminal domain.**

1380 (A) HEK cells are transfected with full-length DCX (FL) or N-DCX (N) for two days. Protein lysates  
 1381 were used for immunoprecipitation and analyzed by Western blot as indicated in the figure. More N-  
 1382 DCX proteins are precipitated with DHC compared to full-length DCX, while similar amount of full-  
 1383 length DCX and N-DCX is expressed in transfected cells. (B) HEK cells are transfected with full-length  
 1384 DCX (FL) with/without C-DCX (C) for two days. The presence of C-DCX decreases association of full-  
 1385 length DCX with DHC. (C) Similarly, C-DCX decreases association of N-DCX with DHC. C-DCX does  
 1386 not bind DHC.

1387

1388

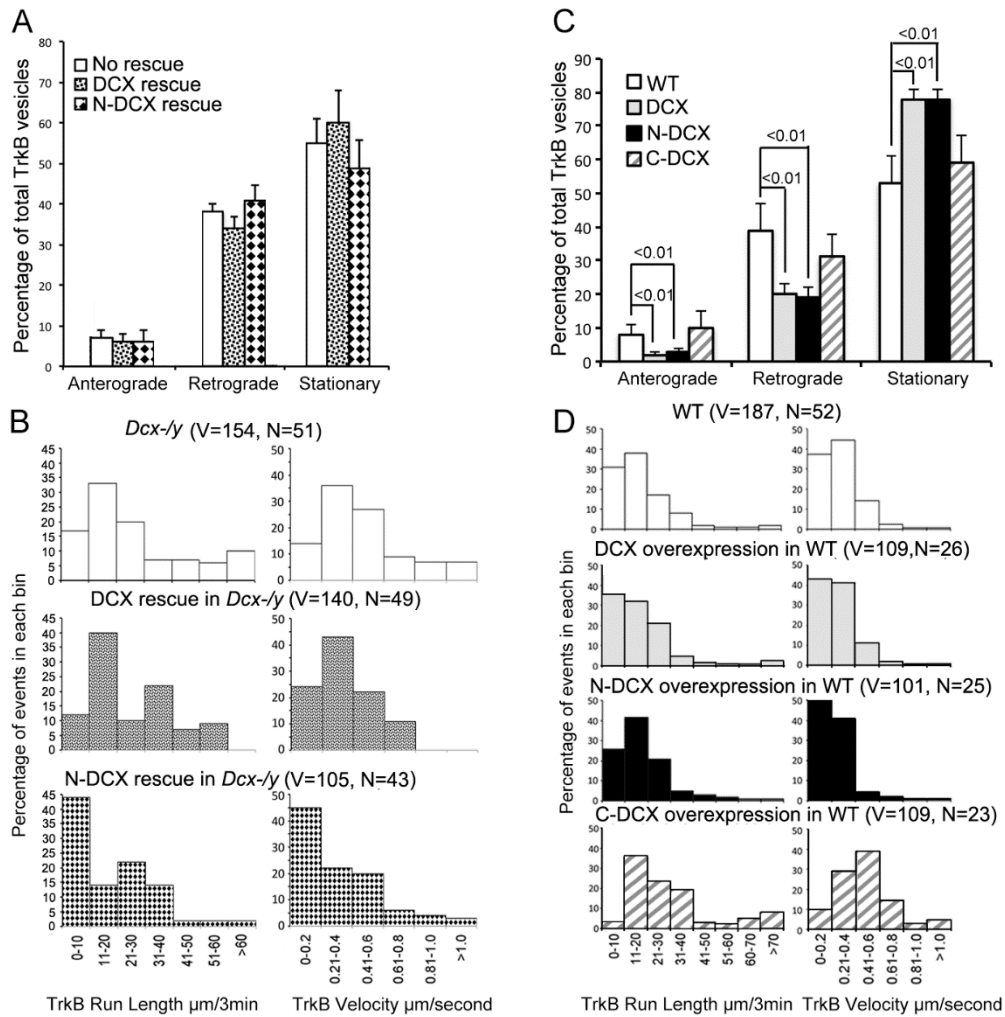

1389

**1390 Supplemental Figure 3. DCX affects the retrograde transport through DCX/dynein interaction.** (A) 1391 Distribution calculations of the TrkB vesicle mobility status (anterograde, retrograde, and 1392 stationary) are demonstrated. No significant differences are observed among different neurons. (B) Run length and 1393 velocity distributions of retrograde TrkB complexes in axons from different neurons are shown. Total 1394 numbers of neurons (N) and vesicles (V) used in the calculations are indicated in the panel. (C) 1395 Distribution calculations of the TrkB vesicle mobility status (anterograde, retrograde, and stationary) in 1396 axons from WT cells with different transfections are demonstrated. Overexpression of DCX or N-DCX 1397 significantly increased percentage of stationary TrkB vesicles in axons, while decreased the percentile of 1398 both anterograde and retrograde transport. (D) Run length and velocity distributions of retrograde TrkB 1399 complexes in axons from different neurons are shown. Total numbers of neurons (N) and vesicles (V) 1400 used in the calculations are indicated in the panel.

1401



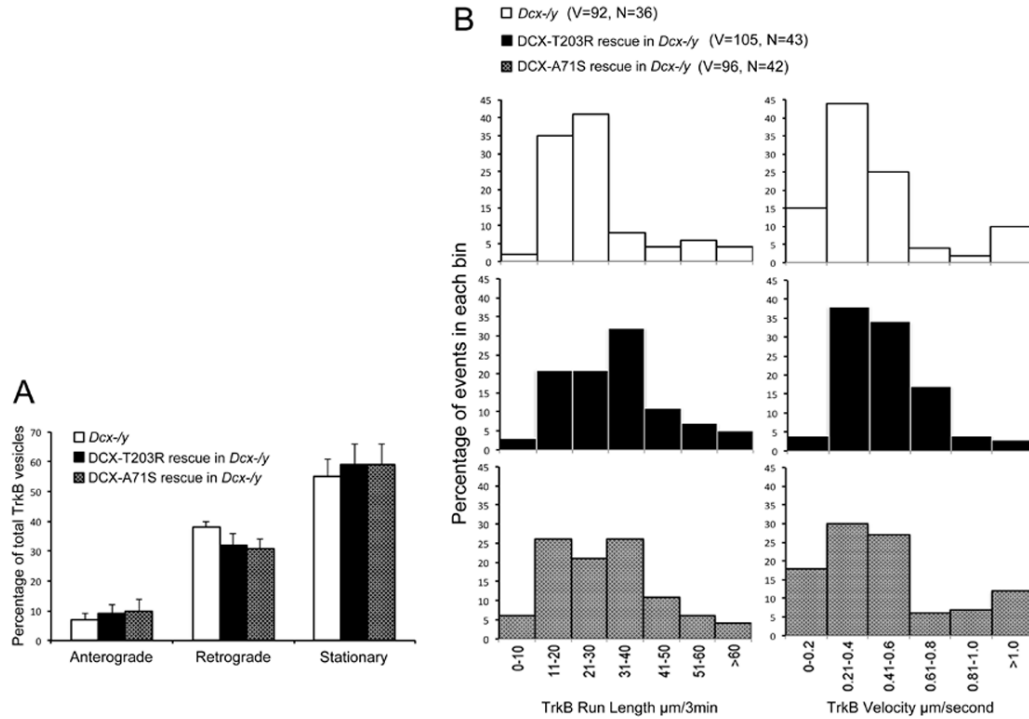

1402

1403 **Supplemental Figure 4. DCX effect on the retrograde trafficking needs DCX/MT interaction.** (A)  
 1404 Distribution calculations of the TrkB vesicle mobility status (anterograde, retrograde, and stationary) in  
 1405 different cells are demonstrated. No significant differences are observed among different neurons. (B)  
 1406 Run length and velocity distributions of retrograde TrkB complexes in axons from different neurons are  
 1407 shown. Total numbers of neurons (N) and vesicles (V) used in the calculations are indicated in the panel.  
 1408

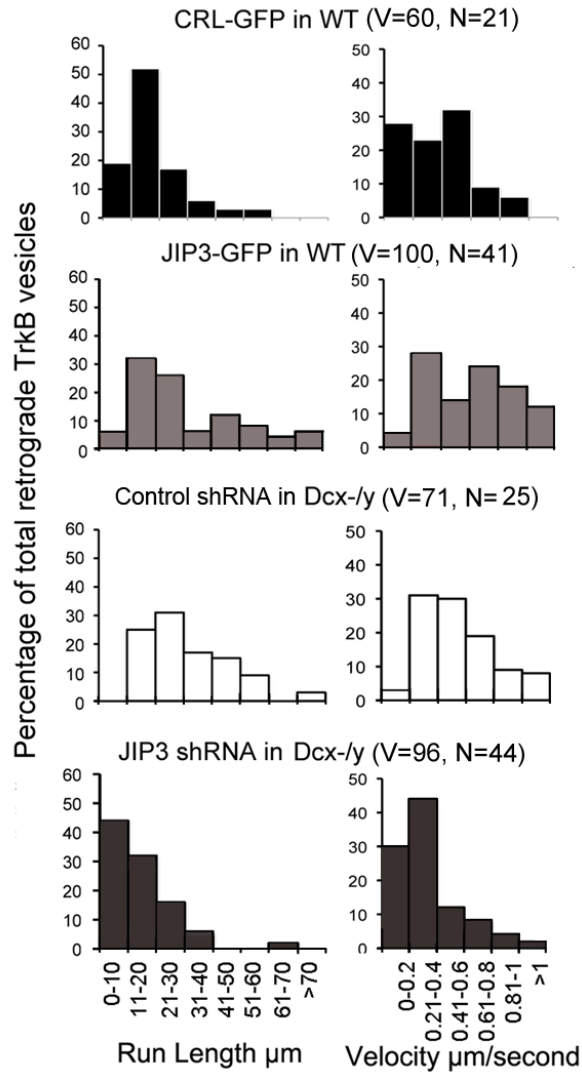

1409

1410 **Supplemental Figure 5. JIP3 enhances retrograde transport of TrkB.** Run length and velocity  
 1411 distributions of retrograde TrkB complexes in axons from different neurons are shown.  
 1412

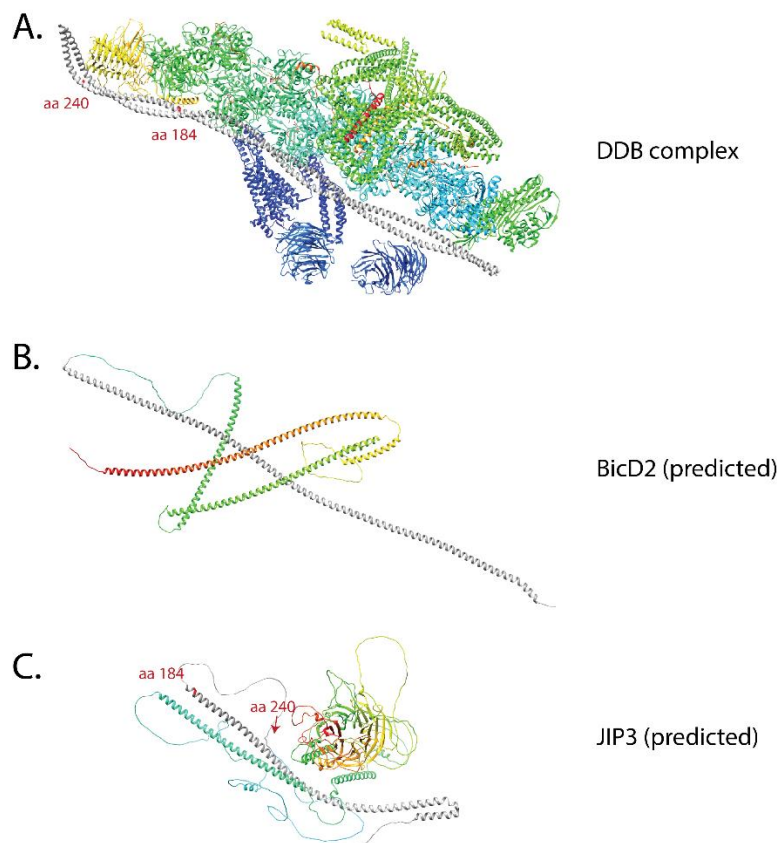

1413

1414 **Supplemental Figure 6: Comparison of the predicted structures of BicD2 and JIP3 with cryo-EM**  
1415 **structure of DDB containing BicD2.** (A) Cryo-EM structure of DDB complex (PDB 5AFU)  
1416 (Urnavicius et al., 2015). The structure shows that the first coiled coil of BicD2 (dark gray)  
1417 275, which spans the full length of dynactin shoulder. (B) Predicted BicD2 (Uniprot Q8TD16) structure.  
1418 The dark gray indicated the first  $\alpha$ -helix that was predicted to extend to aa 272 (Jumper et al., 2021),  
1419 which corresponds to the cryo-EM structure. (C) Predicted JIP3 (Uniprot Q9UPT6) structure. The dark  
1420 gray indicated the first  $\alpha$ -helix is predicted to be up to aa184. The region between aa 185 and aa 240 was  
1421 predicted to be disordered. The red labels in (A) indicate the beginning (aa 6) of the BicD2  $\alpha$ -helix, the  
1422 position of aa 187 to show the estimated end of the predicted  $\alpha$ -helix in JIP3 in (C), and the position of  
1423 aa 240 to show the estimated aa 240 position of JIP3, should the disorder region of JIP3 forms  $\alpha$ -helix  
1424 upon interaction with dynactin. The red labels in (B) and (C) indicates the beginning and end of the  
1425 predicted first  $\alpha$ -helix in BicD2 and JIP3, respectively.  
1426

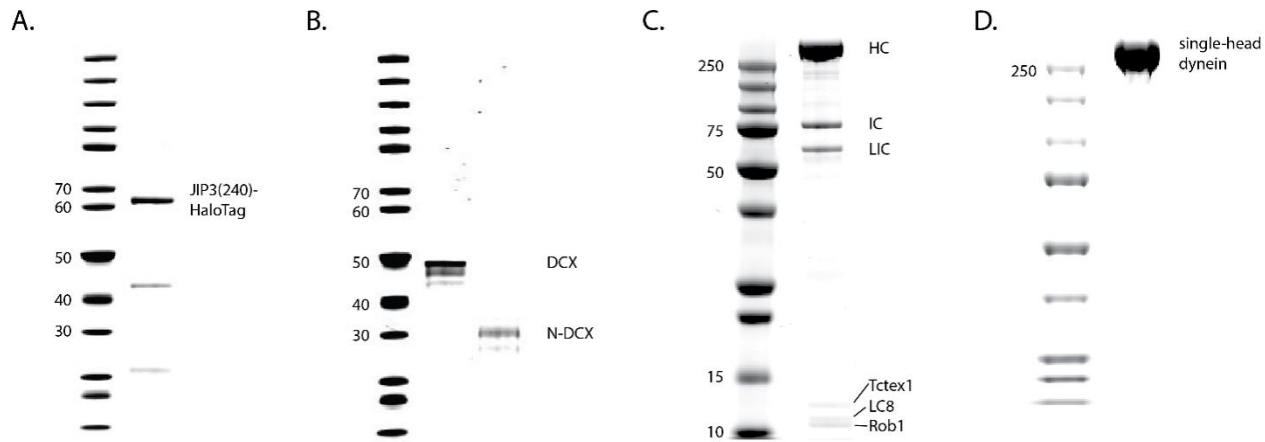

1428 **Supplemental Figure 7: PAGE gels of recombinant expressed proteins.** (A) JIP3(aa1-240)-HaloTag.  
1429 (B) DCX-ybbR and N-DCX-ybbR. (C) Human dynein complex, containing a heavy chain (HC) with a  
1430 SNAP-tag, an intermediate chain (IC), a light intermediate chain (LIC), and three light chains (Tctex1,  
1431 LC8, Rob1). (D) Single-head human dynein-GFP.  
1432

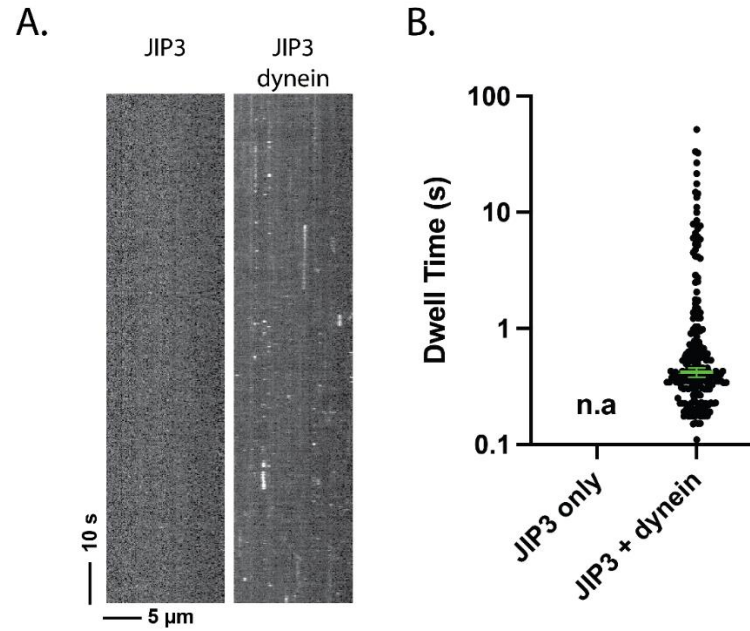

1433

1434 **Supplemental Figure 8: JIP3 has a transient affinity for dynein.** (A) Kymograph of JIP3 on  
1435 microtubules, without (left) or with (right) dynein present. Without dynein, JIP3 shows no affinity for  
1436 microtubules; in the presence of dynein, JIP3 demonstrated brief binding events via dynein. The  
1437 concentration of dynein was 1 nM, and the concentration of JIP3 was 10 nM. (B) The dwell time JIP3  
1438 on microtubule via dynein. Without dynein, there was no measurable dwelling of JIP3; with dynein, the  
1439 dwell time of JIP3 on dynein is 0.42 [0.38, 0.46] s (median [95% CI]).  
1440

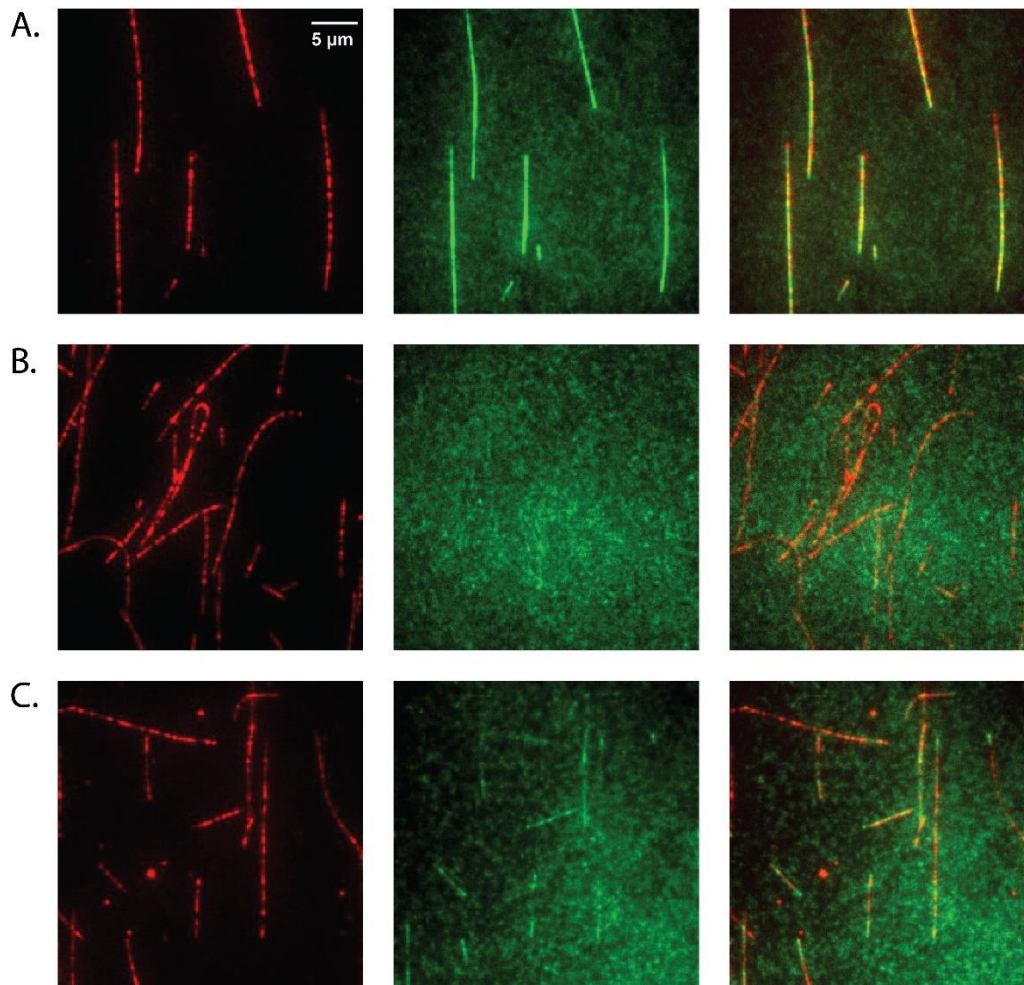

1441

1442 **Supplemental Figure 9. DCX binds MTs.** (A) At 10 nM concentration, DCX uniformly decorates  
1443 microtubules. DCX-ybbR was labeled with CoA-CF488, and microtubules were labeled with Cy5. (B) At  
1444 10 nM concentration, N-DCX doesn't bind to microtubules in the motility buffer. N-DCX-ybbR was  
1445 labeled with CoA-CF488. (C) At 10 nM concentration, N-DCX decorates microtubule in a buffer that is  
1446 half of the ionic strength of motility buffer.
